# Supplementary material
Source: PubMed Central journal article supplement (PMC5330213)
Supplement: NIHMS833908-supplement-supplement_1.pdf [file NIHMS833908-supplement-supplement_1.pdf]

**SUPPLEMENTARY ONLINE TABLES**

**Supplementary Table 1. Example of the database search strategy, CAB Direct**

| Search ID #              | Search terms                                                                                                | Results |
|--------------------------|-------------------------------------------------------------------------------------------------------------|---------|
| 1                        | (nutrition education) AND (diabetes prevention)                                                             | 630     |
| 2                        | (dietary education) AND (diabetes prevention)                                                               | 136     |
| 3                        | (Lifestyle intervention) AND (diabetes prevention)                                                          | 689     |
| 4                        | (Behavioral intervention) AND (diabetes prevention)                                                         | 109     |
| 5                        | (Lifestyle intervention) AND (diabetes prevention) AND (prediabetes)                                        | 54      |
| 6                        | (Glucose tolerance) OR (Glucose homeostasis) OR (Fasting glucose) AND (nutrition) AND (diabetes prevention) | 554     |
| 7                        | (cost-effectiveness) AND (diabetes prevention) OR (prediabetes) AND (nutrition )                            | 5       |
| 8                        | (cost) AND (Lifestyle intervention) AND (nutrition education) AND (diabetes prevention) OR (prediabetes)    | 44      |
| 9                        | (dietary education) AND (prediabetes)                                                                       | 7       |
| 10                       | (registered dietitian) OR (registered dietician) AND (diabetes)                                             | 11      |
| Total number of articles |                                                                                                             | 2239    |

**Supplementary Table 2. Example of the database search strategy, PubMed**

| Search ID # | Search terms                                    | Search details                                                                                                                                                                                                                                                                                                                                                                                                                                                                                                                                                                                                                                                                                                                                                                                                                                                                                                                                                                                                          | Results |
|-------------|-------------------------------------------------|-------------------------------------------------------------------------------------------------------------------------------------------------------------------------------------------------------------------------------------------------------------------------------------------------------------------------------------------------------------------------------------------------------------------------------------------------------------------------------------------------------------------------------------------------------------------------------------------------------------------------------------------------------------------------------------------------------------------------------------------------------------------------------------------------------------------------------------------------------------------------------------------------------------------------------------------------------------------------------------------------------------------------|---------|
| 1           | (nutrition education) AND (diabetes prevention) | ((("nutritional status"[MeSH Terms] OR ("nutritional"[All Fields] AND "status"[All Fields]) OR "nutritional status"[All Fields] OR "nutrition"[All Fields] OR "nutritional sciences"[MeSH Terms] OR ("nutritional"[All Fields] AND "sciences"[All Fields]) OR "nutritional sciences"[All Fields]) AND ("education"[Subheading] OR "education"[All Fields] OR "educational status"[MeSH Terms] OR ("educational"[All Fields] AND "status"[All Fields]) OR "educational status"[All Fields] OR "education"[All Fields] OR "education"[MeSH Terms])) AND ((("diabetes mellitus"[MeSH Terms] OR ("diabetes"[All Fields] AND "mellitus"[All Fields]) OR "diabetes mellitus"[All Fields] OR "diabetes"[All Fields] OR "diabetes insipidus"[MeSH Terms] OR ("diabetes"[All Fields] AND "insipidus"[All Fields]) OR "diabetes insipidus"[All Fields]) AND ("prevention and control"[Subheading] OR ("prevention"[All Fields] AND "control"[All Fields]) OR "prevention and control"[All Fields] OR "prevention"[All Fields])))) | 889     |

|   |                                                    |                                                                                                                                                                                                                                                                                                                                                                                                                                                                                                                                                                                                                                                                                                                                                                                         |      |
|---|----------------------------------------------------|-----------------------------------------------------------------------------------------------------------------------------------------------------------------------------------------------------------------------------------------------------------------------------------------------------------------------------------------------------------------------------------------------------------------------------------------------------------------------------------------------------------------------------------------------------------------------------------------------------------------------------------------------------------------------------------------------------------------------------------------------------------------------------------------|------|
| 2 | (dietary education) AND (diabetes prevention)      | (("diet"[MeSH Terms] OR "diet"[All Fields] OR "dietary"[All Fields]) AND ("education"[Subheading] OR "education"[All Fields] OR "educational status"[MeSH Terms] OR ("educational"[All Fields] AND "status"[All Fields]) OR "educational status"[All Fields] OR "education"[All Fields] OR "education"[MeSH Terms])) AND (("diabetes mellitus"[MeSH Terms] OR ("diabetes"[All Fields] AND "mellitus"[All Fields]) OR "diabetes mellitus"[All Fields] OR "diabetes"[All Fields] OR "diabetes insipidus"[MeSH Terms] OR ("diabetes"[All Fields] AND "insipidus"[All Fields]) OR "diabetes insipidus"[All Fields]) AND ("prevention and control"[Subheading] OR ("prevention"[All Fields] AND "control"[All Fields]) OR "prevention and control"[All Fields] OR "prevention"[All Fields])) | 1452 |
| 3 | (Lifestyle intervention) AND (diabetes prevention) | (("life style"[MeSH Terms] OR ("life"[All Fields] AND "style"[All Fields]) OR "life style"[All Fields] OR "lifestyle"[All Fields]) AND ("Intervention (Amstelveen)"[Journal] OR "intervention"[All Fields] OR "Interv Sch Clin"[Journal] OR "intervention"[All Fields])) AND (("diabetes mellitus"[MeSH Terms] OR ("diabetes"[All Fields] AND "mellitus"[All Fields]) OR "diabetes mellitus"[All Fields] OR "diabetes"[All Fields] OR "diabetes insipidus"[MeSH Terms] OR ("diabetes"[All Fields] AND "insipidus"[All Fields]) OR                                                                                                                                                                                                                                                       | 1690 |

|   |                                                     |                                                                                                                                                                                                                                                                                                                                                                                                                                                                                                                                                                                                                                                                                                   |      |
|---|-----------------------------------------------------|---------------------------------------------------------------------------------------------------------------------------------------------------------------------------------------------------------------------------------------------------------------------------------------------------------------------------------------------------------------------------------------------------------------------------------------------------------------------------------------------------------------------------------------------------------------------------------------------------------------------------------------------------------------------------------------------------|------|
|   |                                                     | "diabetes insipidus"[All Fields]) AND ("prevention and control"[Subheading] OR ("prevention"[All Fields] AND "control"[All Fields]) OR "prevention and control"[All Fields] OR "prevention"[All Fields]))                                                                                                                                                                                                                                                                                                                                                                                                                                                                                         |      |
| 4 | (Behavioral intervention) AND (diabetes prevention) | ("behavior therapy"[MeSH Terms] OR ("behavior"[All Fields] AND "therapy"[All Fields]) OR "behavior therapy"[All Fields] OR ("behavioral"[All Fields] AND "intervention"[All Fields]) OR "behavioral intervention"[All Fields]) AND (("diabetes mellitus"[MeSH Terms] OR ("diabetes"[All Fields] AND "mellitus"[All Fields]) OR "diabetes mellitus"[All Fields] OR "diabetes"[All Fields] OR "diabetes insipidus"[MeSH Terms] OR ("diabetes"[All Fields] AND "insipidus"[All Fields]) OR "diabetes insipidus"[All Fields]) AND ("prevention and control"[Subheading] OR ("prevention"[All Fields] AND "control"[All Fields]) OR "prevention and control"[All Fields] OR "prevention"[All Fields])) | 1556 |
| 5 | (Lifestyle intervention) AND (diabetes prevention)  | ((("life style"[MeSH Terms] OR ("life"[All Fields] AND "style"[All Fields]) OR "life style"[All Fields] OR "lifestyle"[All Fields]) AND ("Intervention (Amstelveen)"[Journal] OR "intervention"[All Fields] OR "Interv Sch Clin"[Journal] OR "intervention"[All Fields])) AND (("diabetes mellitus"[MeSH Terms] OR ("diabetes"[All Fields] AND "mellitus"[All                                                                                                                                                                                                                                                                                                                                     | 173  |

|   |                                                                                                 |                                                                                                                                                                                                                                                                                                                                                                                                                                                                                                                                                                                                                                                                                            |     |
|---|-------------------------------------------------------------------------------------------------|--------------------------------------------------------------------------------------------------------------------------------------------------------------------------------------------------------------------------------------------------------------------------------------------------------------------------------------------------------------------------------------------------------------------------------------------------------------------------------------------------------------------------------------------------------------------------------------------------------------------------------------------------------------------------------------------|-----|
|   | AND<br>(prediabetes)                                                                            | Fields]) OR "diabetes mellitus"[All Fields] OR "diabetes"[All Fields] OR "diabetes insipidus"[MeSH Terms] OR ("diabetes"[All Fields] AND "insipidus"[All Fields]) OR "diabetes insipidus"[All Fields]) AND ("prevention and control"[Subheading] OR ("prevention"[All Fields] AND "control"[All Fields]) OR "prevention and control"[All Fields] OR "prevention"[All Fields])) AND ("prediabetic state"[MeSH Terms] OR ("prediabetic"[All Fields] AND "state"[All Fields]) OR "prediabetic state"[All Fields] OR "prediabetes"[All Fields])                                                                                                                                                |     |
| 6 | (Glucose tolerance) OR (Glucose homeostasis) OR (Fasting glucose) AND (nutrition) AND (diabetes | ((("glucose"[MeSH Terms] OR "glucose"[All Fields]) AND ("immune tolerance"[MeSH Terms] OR ("immune"[All Fields] AND "tolerance"[All Fields]) OR "immune tolerance"[All Fields] OR "tolerance"[All Fields] OR "drug tolerance"[MeSH Terms] OR ("drug"[All Fields] AND "tolerance"[All Fields]) OR "drug tolerance"[All Fields])) OR ((("glucose"[MeSH Terms] OR "glucose"[All Fields]) AND ("homeostasis"[All Fields] OR "homeostasis"[MeSH Terms] OR "homeostasis"[All Fields])) OR (("fasting"[MeSH Terms] OR "fasting"[All Fields]) AND ("glucose"[MeSH Terms] OR "glucose"[All Fields])) AND ("nutritional status"[MeSH Terms] OR ("nutritional"[All Fields] AND "status"[All Fields])) | 690 |

|   |                                                                                  |                                                                                                                                                                                                                                                                                                                                                                                                                                                                                                                                                                                                                                                                          |     |
|---|----------------------------------------------------------------------------------|--------------------------------------------------------------------------------------------------------------------------------------------------------------------------------------------------------------------------------------------------------------------------------------------------------------------------------------------------------------------------------------------------------------------------------------------------------------------------------------------------------------------------------------------------------------------------------------------------------------------------------------------------------------------------|-----|
|   | prevention)                                                                      | OR "nutritional status"[All Fields] OR "nutrition"[All Fields] OR "nutritional sciences"[MeSH Terms] OR ("nutritional"[All Fields] AND "sciences"[All Fields]) OR "nutritional sciences"[All Fields]) AND (("diabetes mellitus"[MeSH Terms] OR ("diabetes"[All Fields] AND "mellitus"[All Fields]) OR "diabetes mellitus"[All Fields] OR "diabetes"[All Fields] OR "diabetes insipidus"[MeSH Terms] OR ("diabetes"[All Fields] AND "insipidus"[All Fields]) OR "diabetes insipidus"[All Fields]) AND ("prevention and control"[Subheading] OR ("prevention"[All Fields] AND "control"[All Fields]) OR "prevention and control"[All Fields] OR "prevention"[All Fields])) |     |
| 7 | (cost-effectiveness) AND (diabetes prevention) OR (prediabetes) AND (nutrition ) | ((("cost-benefit analysis"[MeSH Terms] OR ("cost-benefit"[All Fields] AND "analysis"[All Fields]) OR "cost-benefit analysis"[All Fields] OR ("cost"[All Fields] AND "effectiveness"[All Fields]) OR "cost effectiveness"[All Fields]) AND (("diabetes mellitus"[MeSH Terms] OR ("diabetes"[All Fields] AND "mellitus"[All Fields]) OR "diabetes mellitus"[All Fields] OR "diabetes"[All Fields] OR "diabetes insipidus"[MeSH Terms] OR ("diabetes"[All Fields] AND "insipidus"[All Fields]) OR "diabetes insipidus"[All Fields]) AND ("prevention and control"[Subheading] OR ("prevention"[All Fields] AND                                                              | 444 |

|   |                                                                                                                                   |                                                                                                                                                                                                                                                                                                                                                                                                                                                                                                                                                                                                                                                                                                                      |    |
|---|-----------------------------------------------------------------------------------------------------------------------------------|----------------------------------------------------------------------------------------------------------------------------------------------------------------------------------------------------------------------------------------------------------------------------------------------------------------------------------------------------------------------------------------------------------------------------------------------------------------------------------------------------------------------------------------------------------------------------------------------------------------------------------------------------------------------------------------------------------------------|----|
|   |                                                                                                                                   | "control"[All Fields]) OR "prevention and control"[All Fields] OR "prevention"[All Fields]))<br><br>OR ("prediabetic state"[MeSH Terms] OR ("prediabetic"[All Fields] AND "state"[All Fields]) OR "prediabetic state"[All Fields] OR "prediabetes"[All Fields])) AND ("nutritional status"[MeSH Terms] OR ("nutritional"[All Fields] AND "status"[All Fields]) OR "nutritional status"[All Fields] OR "nutrition"[All Fields] OR "nutritional sciences"[MeSH Terms] OR ("nutritional"[All Fields] AND "sciences"[All Fields]) OR "nutritional sciences"[All Fields])                                                                                                                                                 |    |
| 8 | (cost) AND<br><br>(Lifestyle<br><br>intervention)<br><br>AND (nutrition<br><br>education)<br><br>AND (diabetes<br><br>prevention) | ((("economics"[Subheading] OR "economics"[All Fields] OR "cost"[All Fields] OR "costs and cost analysis"[MeSH Terms] OR ("costs"[All Fields] AND "cost"[All Fields] AND "analysis"[All Fields]) OR "costs and cost analysis"[All Fields]) AND (("life style"[MeSH Terms] OR ("life"[All Fields] AND "style"[All Fields]) OR "life style"[All Fields] OR "lifestyle"[All Fields]) AND ("Intervention (Amstelveen)"[Journal] OR "intervention"[All Fields] OR "Interv Sch Clin"[Journal] OR "intervention"[All Fields]))) AND (("nutritional status"[MeSH Terms] OR ("nutritional"[All Fields] AND "status"[All Fields]) OR "nutritional status"[All Fields] OR "nutrition"[All Fields] OR "nutritional sciences"[MeSH | 10 |

|   |                                       |                                                                                                                                                                                                                                                                                                                                                                                                                                                                                                                                                                                                                                                                                                                                                                                                                            |    |
|---|---------------------------------------|----------------------------------------------------------------------------------------------------------------------------------------------------------------------------------------------------------------------------------------------------------------------------------------------------------------------------------------------------------------------------------------------------------------------------------------------------------------------------------------------------------------------------------------------------------------------------------------------------------------------------------------------------------------------------------------------------------------------------------------------------------------------------------------------------------------------------|----|
|   |                                       | Terms] OR ("nutritional"[All Fields] AND "sciences"[All Fields]) OR "nutritional sciences"[All Fields]) AND ("education"[Subheading] OR "education"[All Fields] OR "educational status"[MeSH Terms] OR ("educational"[All Fields] AND "status"[All Fields]) OR "educational status"[All Fields] OR "education"[All Fields] OR "education"[MeSH Terms])) AND (("diabetes mellitus"[MeSH Terms] OR ("diabetes"[All Fields] AND "mellitus"[All Fields]) OR "diabetes mellitus"[All Fields] OR "diabetes"[All Fields] OR "diabetes insipidus"[MeSH Terms] OR ("diabetes"[All Fields] AND "insipidus"[All Fields]) OR "diabetes insipidus"[All Fields]) AND ("prevention and control"[Subheading] OR ("prevention"[All Fields] AND "control"[All Fields]) OR "prevention and control"[All Fields] OR "prevention"[All Fields])) |    |
| 9 | (dietary education) AND (prediabetes) | ((("diet"[MeSH Terms] OR "diet"[All Fields] OR "dietary"[All Fields]) AND ("education"[Subheading] OR "education"[All Fields] OR "educational status"[MeSH Terms] OR ("educational"[All Fields] AND "status"[All Fields]) OR "educational status"[All Fields] OR "education"[All Fields] OR "education"[MeSH Terms])) AND ("prediabetic state"[MeSH Terms] OR ("prediabetic"[All Fields] AND "state"[All Fields]) OR "prediabetic state"[All                                                                                                                                                                                                                                                                                                                                                                               | 76 |



|                          |                                                                 |                                                                                                                                                                                                                                                                                                                                                                                                                                                                                                                                          |      |
|--------------------------|-----------------------------------------------------------------|------------------------------------------------------------------------------------------------------------------------------------------------------------------------------------------------------------------------------------------------------------------------------------------------------------------------------------------------------------------------------------------------------------------------------------------------------------------------------------------------------------------------------------------|------|
|                          |                                                                 | Fields] OR "prediabetes"[All Fields])                                                                                                                                                                                                                                                                                                                                                                                                                                                                                                    |      |
| 10                       | (registered dietitian) OR (registered dietician) AND (diabetes) | ((registered[All Fields] AND ("nutritionists"[MeSH Terms] OR "nutritionists"[All Fields] OR "dietitian"[All Fields])) OR (registered[All Fields] AND ("nutritionists"[MeSH Terms] OR "nutritionists"[All Fields] OR "dietician"[All Fields]))) AND ("diabetes mellitus"[MeSH Terms] OR ("diabetes"[All Fields] AND "mellitus"[All Fields]) OR "diabetes mellitus"[All Fields] OR "diabetes"[All Fields] OR "diabetes insipidus"[MeSH Terms] OR ("diabetes"[All Fields] AND "insipidus"[All Fields]) OR "diabetes insipidus"[All Fields]) | 88   |
| Total number of articles |                                                                 |                                                                                                                                                                                                                                                                                                                                                                                                                                                                                                                                          | 7068 |

**Supplementary Table 3. The effectiveness and cost of lifestyle interventions including nutrition education for diabetes prevention: Characteristics of included studies (by publication date)**

| Reference <sup>a</sup>                      | Sample size, mean age, and diabetes risk criteria                                                                       | Active & maintenance phases | Delivery Agent      | Intervention description                                                                                                                                   | Weight (kg)                                                                                                                                                                                           | FBG <sup>b</sup> (mg/dl)                                                 | 2-h BG <sup>c</sup> (mg/dl) | HbA1c <sup>d</sup> (%)                                                                                                                                                                   |
|---------------------------------------------|-------------------------------------------------------------------------------------------------------------------------|-----------------------------|---------------------|------------------------------------------------------------------------------------------------------------------------------------------------------------|-------------------------------------------------------------------------------------------------------------------------------------------------------------------------------------------------------|--------------------------------------------------------------------------|-----------------------------|------------------------------------------------------------------------------------------------------------------------------------------------------------------------------------------|
| US studies with RCT <sup>e</sup> design     |                                                                                                                         |                             |                     |                                                                                                                                                            |                                                                                                                                                                                                       |                                                                          |                             |                                                                                                                                                                                          |
| Tate et al., 2003 <sup>34</sup>             | 92 (46+46) <sup>f</sup><br>Mean age (years): 48.5±9.4<br>Overweight/obese                                               | 12 months /0                | Web site            | IG <sup>g</sup> : Basic internet program plus behavioral e-counseling.<br>CG <sup>h</sup> : Basic internet weight loss program.                            | 12 Mo <sup>i</sup><br>IG: -4.4±6.2 <sup>j</sup><br>CG: -2.0±5.7 <sup>j</sup><br>P=0.04                                                                                                                | 3 Mo<br>IG: -4.6±7.9 <sup>j</sup><br>CG: -0.3±8.4 <sup>j</sup><br>P=0.01 |                             |                                                                                                                                                                                          |
| Ackermann, Finch et al., 2008 <sup>36</sup> | 92(46+46)<br>Mean age (years)<br>CG: 60.1±10.5<br>IG: 56.5±9.7<br>BMI <sup>k</sup> ≥ 24/<br>ADA-score <sup>l</sup> ≥ 10 | 4 months/<br>12 months      | Wellness instructor | IG: 16 classroom-style meetings for goal setting, self-monitoring and problem-solving.<br>CG: brief counseling, materials, and limited access to the YMCA. | 4-6 Mo<br>CG: -2.0 % (-3.3, -0.6) <sup>m</sup><br>IG: -6.0 % (-7.3, -4.7) <sup>m</sup><br>P<0.001<br>12-14 Mo<br>CG:-1.8 % (-3.9, 0.3) <sup>m</sup><br>IG: -6.0% (-8.3, -3.8) <sup>m</sup><br>P=0.008 |                                                                          |                             | 4-6 Mo<br>CG: -0.1 (-0.2, 0.01) <sup>j</sup><br>IG: -0.1 (-0.2, 0.01) <sup>j</sup><br>P=0.96<br>12-14 Mo<br>CG: 0 (-0.1, 0.2) <sup>j</sup><br>IG: -0.1 (-0.2,0.1) <sup>j</sup><br>P=0.28 |

| Reference <sup>a</sup>                        | Sample size, mean age, and diabetes risk criteria                                            | Active & maintenance phases | Delivery Agent                      | Intervention description                                                                                                                                    | Weight (kg)                                                                                                                                  | FBG <sup>b</sup> (mg/dl)                                           | 2-h BG <sup>c</sup> (mg/dl) | HbA1c <sup>d</sup> (%)                                                   |
|-----------------------------------------------|----------------------------------------------------------------------------------------------|-----------------------------|-------------------------------------|-------------------------------------------------------------------------------------------------------------------------------------------------------------|----------------------------------------------------------------------------------------------------------------------------------------------|--------------------------------------------------------------------|-----------------------------|--------------------------------------------------------------------------|
| Estabrooks and Smith-Ray, 2008 <sup>38</sup>  | 77(39+38)<br>Mean age (years): 59<br>Prediabetic <sup>o</sup>                                | 3 months /0                 | IVR <sup>n</sup> telephone messages | IG: a series of IVR telephone calls over the 12-week study period.<br>CG: standard care 90-min diabetes prevention class.                                   | BL <sup>p</sup><br>IG: 88.2±18.4 <sup>q</sup><br>CG: 87.3±18.5 <sup>q</sup><br>3 Mo<br>IG: 86±18.7 <sup>q</sup><br>CG:85.8±18.2 <sup>q</sup> |                                                                    |                             |                                                                          |
| Almeida, Shetterly et al., 2010 <sup>40</sup> | 1520 (760+760)<br>Mean age (years): 63±10<br>Overweight/<br>Prediabetic/IG<br>T <sup>r</sup> | 12 months /0                | Dietitian                           | IG: a presentation by a dietitian to a class of 10-20 participants and a 90-minute session.<br>CG: a dummy date for participation in a small-group session. | 12 Mo<br>IG: -1.4 (-1.6, -1.1) <sup>j, q</sup><br>p<0.001<br>CG : -0.6 (-0.9, -0.4) <sup>j, q</sup><br>p<0.001                               |                                                                    |                             |                                                                          |
| Parikh, Simon et al., 2010 <sup>43</sup>      | 99<br>Mean age (years): 48<br>Overweight                                                     | 6 months/ 6 months          | Lay leaders                         | IG: culturally sensitive curriculum with simple, actionable messages to make lifestyle changes.<br>CG: Delayed intervention                                 | 12 Mo<br>IG: -3.3±3.3 <sup>j, q</sup><br>CG:-1.1±3.7 <sup>j, q</sup><br>P=0.01                                                               | 12 Mo<br>IG: 10±13 <sup>j</sup><br>CG:11±11 <sup>j</sup><br>p=0.83 |                             | 12 Mo<br>IG: -0.3±0.2 <sup>j</sup><br>CG:-0.3±0.2 <sup>j</sup><br>p=0.13 |
| Vadheim, McPherson et al.,                    | 27 (14+13)<br>Mean age (years):                                                              | 4 months/ 6                 | RD <sup>s</sup>                     | IG: same core curriculum sessions via telehealth video                                                                                                      | 4 Mo<br>IG: -6.7±3.7 <sup>j</sup><br>CG:-6.5±3.1 <sup>j</sup>                                                                                |                                                                    |                             |                                                                          |

| Reference <sup>a</sup>                            | Sample size, mean age, and diabetes risk criteria                                          | Active & maintenance phases | Delivery Agent                               | Intervention description                                                                                                                                                                                                      | Weight (kg)                                                                                                                                              | FBG <sup>b</sup> (mg/dl)                                                                      | 2-h BG <sup>c</sup> (mg/dl) | HbA1c <sup>d</sup> (%) |
|---------------------------------------------------|--------------------------------------------------------------------------------------------|-----------------------------|----------------------------------------------|-------------------------------------------------------------------------------------------------------------------------------------------------------------------------------------------------------------------------------|----------------------------------------------------------------------------------------------------------------------------------------------------------|-----------------------------------------------------------------------------------------------|-----------------------------|------------------------|
| 2010 <sup>44</sup>                                | CG: 53<br>IG: 50<br>Overweight/<br>Prediabetic                                             | months                      |                                              | conferencing.<br>CG: a 16 weekly core curriculum sessions and the 6 monthly after-core sessions.                                                                                                                              | P=0.85                                                                                                                                                   |                                                                                               |                             |                        |
| Katula, Vitolins et al., 2011 <sup>45</sup>       | 301 (150+151)<br>Mean age (years): 57.9±9.5<br>Overweight/<br>Prediabetic                  | 6 months/<br>6 months       | Community health workers (CHW <sup>†</sup> ) | IG: a weekly CHW-led group sessions during the first 6 months and two scheduled contacts with CHW each month from 7 to 12 months.<br>CG: usual care of two individual sessions with a nutritionist during the first 3 months. | 12 Mo<br>-5.73±0.42 <sup>u</sup><br>P<0.001                                                                                                              | 12 Mo<br>-3.76±0.76 <sup>u</sup><br>P<0.001                                                   |                             |                        |
| Kanaya, Santoyo-Olsson et al., 2012 <sup>49</sup> | 230 (113+117)<br>Mean age (years)<br>CG: 55 ±17<br>IG: 58 ±16<br>A capillary blood glucose | 6 months/<br>6 months       | Trained health department counselors         | IG: a telephone-based counseling of education and skills training to modify diet and physical activity in Spanish and English.<br>CG: wait-list control                                                                       | 6 Mo<br>CG: -0.2±0.26 <sup>i, q</sup><br>IG: -1.0± 0.3 <sup>j, q</sup><br>P=0.03<br>12 Mo<br>CG: -0.2±0.4 <sup>j, q</sup><br>IG: -0.6± 0.32 <sup>j</sup> | 6 Mo<br>CG: 0.42±1.04 <sup>j</sup><br>IG: -0.70±0.87 <sup>j</sup><br>P=0.41<br>12 Mo<br>CG: - |                             |                        |

| Reference <sup>a</sup>                     | Sample size, mean age, and diabetes risk criteria                           | Active & maintenance phases | Delivery Agent | Intervention description                                                                                                                                                                                                             | Weight (kg)                                                                                                                            | FBG <sup>b</sup> (mg/dl)                                               | 2-h BG <sup>c</sup> (mg/dl) | HbA1c <sup>d</sup> (%)                                                                                                                          |
|--------------------------------------------|-----------------------------------------------------------------------------|-----------------------------|----------------|--------------------------------------------------------------------------------------------------------------------------------------------------------------------------------------------------------------------------------------|----------------------------------------------------------------------------------------------------------------------------------------|------------------------------------------------------------------------|-----------------------------|-------------------------------------------------------------------------------------------------------------------------------------------------|
|                                            | value is between 106 and 160 mg/dl                                          |                             |                | group.                                                                                                                                                                                                                               | <sup>q</sup><br>P=0.4                                                                                                                  | 1.39±0.96 <sup>j</sup><br>IG: -<br>0.88±1.02 <sup>j</sup><br>P=0.72    |                             |                                                                                                                                                 |
| Cole, Boyer et al., 2013 <sup>51</sup>     | 65(34+31)<br>Mean age (years): 58.3±9.6<br>Prediabetic                      | 3 months/<br>12 months      | RD             | IG: three 90-minute nutrition shared medical appointments (SMA) sessions.<br>CG: a 45- to 60-minute individualized counseling session with a registered dietitian.                                                                   | 3 Mo<br>IG:-3.0±3.0 <sup>j</sup><br>CG-1.6±3.3 <sup>j</sup><br>P<0.05<br>12 Mo<br>IG:-1.5± 4.4 <sup>j</sup><br>CG-1.2±4.4 <sup>j</sup> |                                                                        |                             | 3 Mo<br>IG: 0.1±0.4 <sup>j</sup><br>CG0.4±1.1 <sup>j</sup><br>P<0.05<br>12 Mo<br>IG: 0.1±0.4 <sup>j</sup><br>CG: 0.5±1.3 <sup>j</sup><br>P<0.05 |
| Islam, Zanowiak et al., 2013 <sup>52</sup> | 48(25+23)<br>Mean age (years): 59.7<br>Family history of diabetes/ADA score | 6 months/<br>0              | CHW            | IG: interventions with follow-up phone calls from the CHW to discuss the challenges and strategies for improving diet and physical activity.<br>CG: intervention sessions were held every 3 weeks in a convenient community setting. | 6 Mo<br>IG: -0.5±1.7 <sup>j, q</sup><br>CG: 0.3±1.5 <sup>j, q</sup><br>P=0.14                                                          | 6 Mo<br>IG:4.0±30.8 <sup>j</sup><br>CG:0.4±27.4 <sup>j</sup><br>P=0.74 |                             |                                                                                                                                                 |

| Reference <sup>a</sup>                      | Sample size, mean age, and diabetes risk criteria                            | Active & maintenance phases | Delivery Agent | Intervention description                                                                                                                                                                                                                 | Weight (kg)                                                                                                                                                                                                                        | FBG <sup>b</sup> (mg/dl)                    | 2-h BG <sup>c</sup> (mg/dl) | HbA1c <sup>d</sup> (%) |
|---------------------------------------------|------------------------------------------------------------------------------|-----------------------------|----------------|------------------------------------------------------------------------------------------------------------------------------------------------------------------------------------------------------------------------------------------|------------------------------------------------------------------------------------------------------------------------------------------------------------------------------------------------------------------------------------|---------------------------------------------|-----------------------------|------------------------|
| Katula, Vitolins et al., 2013 <sup>53</sup> | 301 (150+151)<br>Mean age (years): 57.9±9.5<br>Overweight/<br>Prediabetic    | 6 months/<br>18 months      | CHW            | IG: three personalized consultations, two scheduled contact with the CHW each month, one group session and one telephone contact.<br>CG: usual care of two individual sessions involving healthy eating and physical activity education. | 24 Mo<br>-4.9±0.71 <sup>u</sup><br>P<0.001                                                                                                                                                                                         | 24 Mo<br>-4.35±1.14 <sup>u</sup><br>P<0.001 |                             |                        |
| Ma, Yank et al., 2013 <sup>25</sup>         | 160 (79+81)<br>Mean age (years): 53±11<br>Prediabetic/<br>Metabolic syndrome | 3 months/<br>12 months      | RD             | IG: face-to-face weekly classes via a home-based DVD to self-directed group.<br>CG: the same classes in face-to-face manner for coach-led group over 12 weeks.                                                                           | 3 Mo<br>IG: -4.5±0.8 <sup>j</sup><br>CG: -5.4±0.7 <sup>j</sup><br>P=0.09<br>6 Mo<br>IG: -4.3±0.8 <sup>j</sup><br>CG: -6.6±0.8 <sup>j</sup><br>p<0.001<br>15 Mo<br>IG: -4.5±0.9 <sup>j</sup><br>CG: -6.3±0.9 <sup>j</sup><br>P=0.04 |                                             |                             |                        |

| Reference <sup>a</sup>                      | Sample size, mean age, and diabetes risk criteria                                                                           | Active & maintenance phases | Delivery Agent  | Intervention description                                                                                                                                       | Weight (kg)                                                                          | FBG <sup>b</sup> (mg/dl) | 2-h BG <sup>c</sup> (mg/dl) | HbA1c <sup>d</sup> (%) |
|---------------------------------------------|-----------------------------------------------------------------------------------------------------------------------------|-----------------------------|-----------------|----------------------------------------------------------------------------------------------------------------------------------------------------------------|--------------------------------------------------------------------------------------|--------------------------|-----------------------------|------------------------|
| Xiao, Yank et al., 2013 <sup>54</sup>       | 160 (79+81)<br>Mean age (years): 53±11<br>Prediabetic/<br>Metabolic syndrome                                                | 3 months/<br>21 months      | RD              | IG: face-to-face weekly classes via a home-based DVD to self-directed group.<br>CG: the same classes in face-to-face manner for coach-led group over 12 weeks. | 24 Mo<br>IG: -4.5±0.9 <sup>j</sup><br>CG: 5.4±0.7 <sup>j</sup>                       |                          |                             |                        |
| Ackermann, Sandy et al., 2014 <sup>55</sup> | 306 (153+153)<br>Mean age (years): 46.7±11.3<br>A parent or a sibling has diabetes/personal history of gestational diabetes | 5 months/<br>7 months       | Lifestyle coach | IG: VOD programming in combination with an interactive web portal (VOD Plus).<br>CG: DPP by Video On-Demand (VOD) alone.                                       | 5 Mo<br>IG: 2.9% (0.7-4.2) <sup>m</sup><br>CG: 3.7% (1.9-5.0) <sup>m</sup><br>P=0.23 |                          |                             |                        |

| Reference <sup>a</sup>                     | Sample size, mean age, and diabetes risk criteria                                                        | Active & maintenance phases | Delivery Agent         | Intervention description                                                                                                                                                                                               | Weight (kg)                                                                                                                                          | FBG <sup>b</sup> (mg/dl)                                                                                                                 | 2-h BG <sup>c</sup> (mg/dl) | HbA1c <sup>d</sup> (%) |
|--------------------------------------------|----------------------------------------------------------------------------------------------------------|-----------------------------|------------------------|------------------------------------------------------------------------------------------------------------------------------------------------------------------------------------------------------------------------|------------------------------------------------------------------------------------------------------------------------------------------------------|------------------------------------------------------------------------------------------------------------------------------------------|-----------------------------|------------------------|
| Islam, Zanowiak et al., 2014 <sup>57</sup> | 126(76+50)<br>Mean age (years):<br>IG: 46.3±11.6<br>CG: 47.8±9.5<br>Family history of diabetes/ADA score | 6 months/0                  | CHW supervisor         | IG: a multi-component CHW-led intervention, which is consisted of six 2-hour interactive group sessions. CG: standard care including seeking preventive and acute care from their usual health care sources as needed. | BL<br>IG: 72.7±12.6<br>CG: 79.3±10.5<br>3 Mo<br>IG: 71.4±12.1<br>CG: 76.7±10.3<br>6 Mo<br>IG: 70.4±11.5<br>CG: 78.8±8.8                              | BL<br>IG:<br>114.5±36.8<br>CG:<br>111.3±22.0<br>3 Mo<br>IG: 96.7±17.6<br>CG:<br>102.2±19.3<br>6 Mo<br>IG: 88.9±16.5<br>CG:<br>113.0±12.0 |                             |                        |
| Fukuoka, Gay et al., 2015 <sup>15</sup>    | 61(30+31)<br>Mean age (years):<br>55.2±9<br>Overweight/obese/Prediabetic/Diabetes risk score ≥5          | 5 months/0                  | Research staff members | IG: Six in-person sessions delivered by two trained non-medical research staff members with the aid of mDPP mobile app. CG: A brochure about pre-diabetes and standard medical care                                    | 3 Mo<br>IG: -5.2±4.4 <sup>j</sup><br>CG: 0.4±1.8 <sup>j</sup><br>P<0.001<br>5 Mo<br>IG: -6.2±5.9 <sup>j</sup><br>CG: 0.3±2.7 <sup>j</sup><br>P<0.001 |                                                                                                                                          |                             |                        |



| Reference <sup>a</sup>                         | Sample size, mean age, and diabetes risk criteria                    | Active & maintenance phases | Delivery Agent                     | Intervention description                                                                                                                                                                          | Weight (kg)                                                                                                                                         | FBG <sup>b</sup> (mg/dl)                                                                                                                              | 2-h BG <sup>c</sup> (mg/dl) | HbA1c <sup>d</sup> (%)                                                                                                                               |
|------------------------------------------------|----------------------------------------------------------------------|-----------------------------|------------------------------------|---------------------------------------------------------------------------------------------------------------------------------------------------------------------------------------------------|-----------------------------------------------------------------------------------------------------------------------------------------------------|-------------------------------------------------------------------------------------------------------------------------------------------------------|-----------------------------|------------------------------------------------------------------------------------------------------------------------------------------------------|
| Yeh, Heo et al., 2015 <sup>63</sup>            | 58 (30+28)<br>Mean age (years)<br>58.8<br>Prediabetic/<br>Overweight | 6 months/<br>6 months       | Trained lifestyle coaches          | IG: 12 bi-weekly core sessions and two 6-monthly follow-up sessions                                                                                                                               | 6 Mo<br>IG: -2.42±1.86 <sup>j,m</sup><br>CG: -0.07±1.46 <sup>j,m</sup><br><br>10 Mo<br>IG: -2.28±1.86 <sup>j,m</sup><br>CG: 0.2±1.46 <sup>j,m</sup> | 6 Mo<br>IG: -0.18±0.38 <sup>j,m</sup><br>CG: -0.12±0.34 <sup>j,m</sup><br><br>10 Mo<br>IG: -0.29±0.38 <sup>j,m</sup><br>CG: -0.09±0.34 <sup>j,m</sup> |                             | 6 Mo<br>IG: -0.19±0.24 <sup>j,m</sup><br>CG: -0.05±0.29 <sup>j,m</sup><br><br>10 Mo<br>IG: 0.001±0.24 <sup>j,m</sup><br>CG: 0.23±0.29 <sup>j,m</sup> |
| US studies with QED <sup>v</sup> design        |                                                                      |                             |                                    |                                                                                                                                                                                                   |                                                                                                                                                     |                                                                                                                                                       |                             |                                                                                                                                                      |
| Davis-Smith, Boltri et al., 2007 <sup>35</sup> | 10<br>Mean age was not reported<br>Prediabetic                       | 2 months/<br>12 months      | Volunteer healthcare professionals | Six sessions over 7 weeks by volunteer healthcare professionals. Handouts for each session were distributed at the beginning of the session. Each session included a review of the activity logs. | BL<br>104.8±25.3 <sup>q</sup><br>6 Mo<br>101.8±27.2 <sup>q</sup><br>12 Mo<br>100±15.7 <sup>q</sup><br>P<0.05                                        | BL<br>109±8.3<br>6 Mo<br>99±9.8<br>12 Mo<br>100±5.8                                                                                                   |                             |                                                                                                                                                      |

| Reference <sup>a</sup>                         | Sample size, mean age, and diabetes risk criteria                                                       | Active & maintenance phases | Delivery Agent              | Intervention description                                                                                                                         | Weight (kg)                                                                                                                  | FBG <sup>b</sup> (mg/dl)                                | 2-h BG <sup>c</sup> (mg/dl) | HbA1c <sup>d</sup> (%) |
|------------------------------------------------|---------------------------------------------------------------------------------------------------------|-----------------------------|-----------------------------|--------------------------------------------------------------------------------------------------------------------------------------------------|------------------------------------------------------------------------------------------------------------------------------|---------------------------------------------------------|-----------------------------|------------------------|
| Boltri, Davis-Smith et al., 2008 <sup>37</sup> | 8<br>Mean age (years):<br>female 52.1<br>Male 52.4<br>Prediabetic                                       | 4 months/<br>12 months      | Group leader                | An individualized lifestyle program including a 16-session church DPP over 4 months.                                                             | BL<br>93.3±15.4 <sup>q</sup><br>6 Mo<br>90.7 <sup>q</sup><br>12 Mo<br>92.8 <sup>q</sup><br>P<0.05                            | BL<br>104±2.8<br>6 Mo<br>100<br>12 Mo<br>97.7<br>P<0.05 |                             |                        |
| Amundson, Butcher et al., 2009 <sup>39</sup>   | 293<br>Mean age (years):<br>53.6±9.7<br>Overweight/pre-diabetic/IGT/IFG/history of gestational diabetes | 4 months/<br>0              | Dietitian                   | A group-based program through 16 weekly sessions followed with a monthly group sessions over a 6-month period led by the lifestyle coaches.      | BL<br>Male:<br>110.6±21.1<br>Female:<br>96.4±18.6<br>4 Mo<br>Male:<br>102±20.4<br>P<0.001<br>Female:<br>90.2±17.7<br>P<0.001 |                                                         |                             |                        |
| Faridi, Shual et al., 2010 <sup>41</sup>       | 161(83+78)<br>Age range (years): 18-79<br>Overweight/<br>A history of gestational diabetes              | 12 months /<br>0            | Certified diabetes educator | IG: A 10-week training session series led by a certified diabetes educator (2 hour per series) with 21 intervention CHAs <sup>w</sup> were held. | 12 Mo<br>IG: 0.14±11.8 <sup>j, q</sup><br>CG:0.37±8.8 <sup>j, q</sup><br>P=0.8974                                            |                                                         |                             |                        |

| Reference <sup>a</sup>                        | Sample size, mean age, and diabetes risk criteria                  | Active & maintenance phases | Delivery Agent            | Intervention description                                                                                                                                             | Weight (kg)                                                                     | FBG <sup>b</sup> (mg/dl)                                                     | 2-h BG <sup>c</sup> (mg/dl) | HbA1c <sup>d</sup> (%)                                                         |
|-----------------------------------------------|--------------------------------------------------------------------|-----------------------------|---------------------------|----------------------------------------------------------------------------------------------------------------------------------------------------------------------|---------------------------------------------------------------------------------|------------------------------------------------------------------------------|-----------------------------|--------------------------------------------------------------------------------|
|                                               |                                                                    |                             |                           | CG: a delayed intervention.                                                                                                                                          |                                                                                 |                                                                              |                             |                                                                                |
| Kramer, Kriska et al., 2010 <sup>42</sup>     | 48 (22+26)<br>Mean age (years): 59.7<br>Overweight/<br>Prediabetic | 3 months/<br>0              | Health care professionals | IG: materials of the GLB-DVD intervention with instructions to view one session/week.<br>CG: a total of 12 health care professional contacts with related materials. | 3 Mo<br>IG: -5.4±5.2 <sup>j, q</sup><br>CG: -6.3±6.5 <sup>j, q</sup><br>P<0.001 | 3 Mo<br>IG: -4.71±6.66 <sup>j</sup><br>CG: 1.15±10.52 <sup>j</sup><br>P=0.98 |                             | 3 Mo<br>IG: -0.16±0.23 <sup>j</sup><br>CG: -0.31±0.25 <sup>j</sup><br>P<0.0001 |
| Kramer, McWilliams et al., 2011 <sup>46</sup> | 81<br>Mean age (years): 52.9<br>Overweight/<br>Prediabetic         | 3 months/<br>0              | Health educators          | A 12-session group lifestyle intervention by the trained diabetes educators in groups with GLB related materials.                                                    | 3 Mo<br>-5.1±4.8 <sup>j, q</sup><br>P<0.001                                     | 3 Mo<br>-2.9±11.3 <sup>j</sup><br>P<0.001                                    |                             |                                                                                |
| Rosal, Lemon et al., 2011 <sup>47</sup>       | 27<br>Mean age (years): 27.8±5.1<br>Overweight/<br>Obese           | 4 months/<br>0              | Dietitian                 | 8 group 2.5-hour sessions led by a WIC nutritionist and co-led by a peer and followed by two telephone contracts.                                                    | 4 Mo<br>-2.1±3.7 <sup>j, q</sup><br>P=0.04                                      |                                                                              |                             |                                                                                |
| Ruggiero, Oros et al.,                        | 69<br>Mean age                                                     | 6 months/                   | A commun-                 | Culturally specific information on                                                                                                                                   | 6 Mo<br>-2.2±4.4 <sup>j, q</sup>                                                |                                                                              |                             |                                                                                |

| Reference <sup>a</sup>                     | Sample size, mean age, and diabetes risk criteria                                                                                    | Active & maintenance phases | Delivery Agent           | Intervention description                                                                                                                                  | Weight (kg)                                              | FBG <sup>b</sup> (mg/dl)               | 2-h BG <sup>c</sup> (mg/dl) | HbA1c <sup>d</sup> (%)                |
|--------------------------------------------|--------------------------------------------------------------------------------------------------------------------------------------|-----------------------------|--------------------------|-----------------------------------------------------------------------------------------------------------------------------------------------------------|----------------------------------------------------------|----------------------------------------|-----------------------------|---------------------------------------|
| 2011 <sup>48</sup>                         | (years):<br>37.86±8.52<br>Prediabetic/<br>Overweight                                                                                 | 6 months                    | ity resident or CHW      | diabetes risk delivered in a small group format with supplemental educational materials in Spanish.                                                       | P=0.016<br>12 Mo<br>-1.3±5.1 <sup>j, q</sup><br>P=0.0649 |                                        |                             |                                       |
| Benyshek, Chino et al., 2013 <sup>50</sup> | 12<br>Mean age (years): 39<br>Overweight/<br>Range of HbA1c is 35 mmol/mol to 64 mmol/mol from a whole blood capillary blood sample. | 4 months/<br>8 months       | Native lifestyle coaches | A 16-week intensive interventions included weight-loss curriculum, meal planning, fat gram and calorie counting, portion size and food content education. | 4 Mo<br>-5.79% <sup>m</sup><br>P=0.010                   | 4 Mo<br>-0.39% <sup>m</sup><br>P=0.502 |                             |                                       |
| Cha, Kim et al., 2014 <sup>56</sup>        | 15<br>Mean age (years): 24.4±2.2<br>Prediabetic/<br>IFG                                                                              | 4 months/<br>0              | RD                       | A 12-week weekly intervention with each participants' reported weekly dietary and exercise habits via handheld device and/or Web site log-in and          | 3 Mo<br>-0.13 <sup>j</sup><br>p=0.031                    | 3 Mo<br>0.39 <sup>j</sup><br>P=0.112   |                             | 3 Mo<br>-0.76 <sup>j</sup><br>p=0.007 |

| Reference <sup>a</sup>                        | Sample size, mean age, and diabetes risk criteria                               | Active & maintenance phases | Delivery Agent             | Intervention description                                                                                                        | Weight (kg)                                                                            | FBG <sup>b</sup> (mg/dl)                                                               | 2-h BG <sup>c</sup> (mg/dl) | HbA1c <sup>d</sup> (%) |
|-----------------------------------------------|---------------------------------------------------------------------------------|-----------------------------|----------------------------|---------------------------------------------------------------------------------------------------------------------------------|----------------------------------------------------------------------------------------|----------------------------------------------------------------------------------------|-----------------------------|------------------------|
|                                               |                                                                                 |                             |                            | individualized phone counsel.                                                                                                   |                                                                                        |                                                                                        |                             |                        |
| Kaholokula, Wilson et al., 2014 <sup>58</sup> | 239<br>Mean age (years): 50.8±14.3<br>Overweight                                | 3 months/0                  | CHA                        | Translated lessons from the original DPP-LI lessons on economical healthy eating and communicating effectively with the doctor. | 3 Mo<br>-1.7±3.5 <sup>j</sup><br>P<0.01                                                |                                                                                        |                             |                        |
| Kramer, Miller et al., 2014 <sup>59</sup>     | 68<br>Mean age (years): 52.9<br>Overweight/obese/Prediabetic/Metabolic syndrome | 3 months/9 months           | Trained diabetes educators | 12 weekly 1-hour sessions conducted by the trained diabetes educator with the completion of home assignments.                   | 4 Mo<br>-5.9±10.3 <sup>j</sup><br>P<0.001<br>12 Mo<br>-5.6±2.5 <sup>j</sup><br>P<0.001 | 4 Mo<br>-3.6±12.5 <sup>j</sup><br>P=0.04<br>12 Mo<br>-4.7±14.7 <sup>j</sup><br>P=0.009 |                             |                        |

| Reference <sup>a</sup>                       | Sample size, mean age, and diabetes risk criteria                       | Active & maintenance phases | Delivery Agent              | Intervention description                                                                                                              | Weight (kg)                                                                                                                    | FBG <sup>b</sup> (mg/dl)                                                                         | 2-h BG <sup>c</sup> (mg/dl) | HbA1c <sup>d</sup> (%)                                                                              |
|----------------------------------------------|-------------------------------------------------------------------------|-----------------------------|-----------------------------|---------------------------------------------------------------------------------------------------------------------------------------|--------------------------------------------------------------------------------------------------------------------------------|--------------------------------------------------------------------------------------------------|-----------------------------|-----------------------------------------------------------------------------------------------------|
| Sepah, Jiang et al., 2014 <sup>60</sup>      | 220<br>Mean age (years): 43.6±12.4<br>Prediabetic/O verweight           | 4 months/ 8 months          | Profess- ional health coach | The DPP lifestyle intervention in an online small-group format with participants ' communication via a private online social network. | 12 Mo<br>Core participants: -4.9±0.5 <sup>j, q</sup><br>P<0.001<br>Post-core participants: -5.1±0.5 <sup>j, q</sup><br>P<0.001 |                                                                                                  |                             | 12 Mo<br>Core participants: -0.37±0.07<br>p<0.0001<br>Post-core participants: 0.40±0.07<br>p<0.0001 |
| Tang, Nwankwo et al., 2014 <sup>61</sup>     | 11<br>Mean age (years): 60±12<br>Overweight/ ADA score≥10               | 2 months/ 3 months          | Peer lifestyle coaches      | 6 group-based face-to-face sessions delivered by peer over 8 weeks and 6 biweekly telephone support calls over a period of 12 weeks.  | 2 Mo<br>-1.6±2.7 <sup>j, q</sup><br>5 Mo<br>-1.2±2.7 <sup>j, q</sup>                                                           |                                                                                                  |                             |                                                                                                     |
| Brokaw, Carpenedo et al., 2015 <sup>62</sup> | 3804<br>Mean age (years) 52.5±11.9<br>Overweight/ Prediabetic/IG T /IFG | 4 months/ 6 months          | RD                          | 10 diabetes self-management education (DSME) programs, two DSME programs in collaboration with their local YMCA                       | 4 Mo<br>-6.2±5.2 <sup>j</sup>                                                                                                  | 4 Mo<br>Age<65<br>-2.5±7.2 <sup>j</sup><br>P<0.001<br>Age≥65<br>-4.8±7.7 <sup>j</sup><br>P<0.001 |                             |                                                                                                     |
| Non-US studies with RCT design               |                                                                         |                             |                             |                                                                                                                                       |                                                                                                                                |                                                                                                  |                             |                                                                                                     |

| Reference <sup>a</sup>                         | Sample size, mean age, and diabetes risk criteria                         | Active & maintenance phases | Delivery Agent | Intervention description                                                                                                                                                                                         | Weight (kg)                                                                | FBG <sup>b</sup> (mg/dl)                                                                                                                                                          | 2-h BG <sup>c</sup> (mg/dl)                                                                                                                                                         | HbA1c <sup>d</sup> (%) |
|------------------------------------------------|---------------------------------------------------------------------------|-----------------------------|----------------|------------------------------------------------------------------------------------------------------------------------------------------------------------------------------------------------------------------|----------------------------------------------------------------------------|-----------------------------------------------------------------------------------------------------------------------------------------------------------------------------------|-------------------------------------------------------------------------------------------------------------------------------------------------------------------------------------|------------------------|
| Eriksson, Lindström et al., 1999 <sup>64</sup> | 212 (112+100)<br>Mean age<br>IG: 54 ±7<br>CG: 52 ±7<br>Overweight/I<br>GT | 12month<br>s/<br>0          | Dietitian      | IG: frequent face-to-face dietary advice tailored to each subject individually and also in group sessions by a nutritionist.<br>CG: dietary advice by verbal and written information at annual follow-up visits. | 12 Mo<br>IG: -4.7±5.5 <sup>j</sup><br>CG: -0.9±4.1 <sup>j</sup><br>P<0.001 | 12 Mo<br>IG: 0±14.4 <sup>j, x</sup><br>CG: 5.4±10.8 <sup>j, x</sup><br>P<0.01                                                                                                     | 12 Mo<br>IG: -<br>16.2±28.8 <sup>j, x</sup><br>CG: -<br>5.4±39.6 <sup>j, x</sup><br>P<0.05                                                                                          |                        |
| Wein, Beischer et al., 1999 <sup>65</sup>      | 193 ( 97+96)<br>Mean age (years)<br>IG: 39.5<br>CG:37.8<br>IGT            | 51 months /0                | Dietitian      | IG: Participants were given the same dietary advice, in addition, telephone was arranged 3-monthly.<br>CG: The control group were given dietary questionnaires and the standard diet advice sheet.               |                                                                            | BL<br>CG:100.9 (99, 104.4) <sup>x</sup><br>IG: 99 (97.2, 102.6) <sup>x</sup><br>51 Mo<br>CG: 109.8 (104.4, 113.4) <sup>x</sup><br>IG: 102.6 (100.8, 106.2) <sup>x</sup><br>P=0.13 | BL<br>CG: 176.4 (174.6, 180) <sup>x</sup><br>IG: 178.2 (174.6, 180) <sup>x</sup><br>51 Mo<br>CG: 178.2 (171, 187.2) <sup>x</sup><br>IG: 176.4 (167.4, 185.4) <sup>x</sup><br>P=0.71 |                        |
| Tuomilehto, Lindström                          | 506 (256+250)                                                             | 12 months/                  | Staff members  | IG: tailored advices on diet and physical                                                                                                                                                                        | 12 Mo<br>CG:-0.8±3.7 <sup>j</sup>                                          | 12 Mo<br>CG: 1±12 <sup>j</sup>                                                                                                                                                    |                                                                                                                                                                                     |                        |

| Reference <sup>a</sup>                           | Sample size, mean age, and diabetes risk criteria                             | Active & maintenance phases | Delivery Agent | Intervention description                                                                                                                                                             | Weight (kg)                                                             | FBG <sup>b</sup> (mg/dl)                                                | 2-h BG <sup>c</sup> (mg/dl)                                                 | HbA1c <sup>d</sup> (%)                                                     |
|--------------------------------------------------|-------------------------------------------------------------------------------|-----------------------------|----------------|--------------------------------------------------------------------------------------------------------------------------------------------------------------------------------------|-------------------------------------------------------------------------|-------------------------------------------------------------------------|-----------------------------------------------------------------------------|----------------------------------------------------------------------------|
| et al., 2001 <sup>24</sup>                       | Mean age (years)<br>55<br>IGT                                                 | 38 months                   |                | activity about how to achieve the goals of the intervention.<br>CG: general oral and written information about diet and exercise at base line and at subsequent annual visits        | IG: -4.2±5.1 <sup>j</sup><br>P<0.001                                    | IG: -4±12 <sup>j</sup><br>P<0.001                                       |                                                                             |                                                                            |
| Lindstrom, Louheranta et al., 2003 <sup>66</sup> | 434 (231+203)<br>Mean age (years)<br>CG: 55 ±7<br>IG: 55 ±7<br>Overweight/IGT | 12 months /36 months        | Dietitian      | IG: face-to -face consultation sessions with the study nutritionist with guide to increase level of physical activity.<br>CG: general information about lifestyle and diabetes risk. | 12 Mo<br>CG: -1±3.7 <sup>j</sup><br>IG: -4.5±5 <sup>j</sup><br>P<0.0001 | 12 Mo<br>CG:0±0.7 <sup>j</sup><br>IG: -0.2±0.7 <sup>j</sup><br>P<0.0001 | 12 Mo<br>CG: -0.3±2.2 <sup>j</sup><br>IG: -0.9±1.9 <sup>j</sup><br>P=0.0001 | 12 Mo<br>CG: 0.1±0.6 <sup>j</sup><br>IG: -0.1±0.7 <sup>j</sup><br>P=0.0003 |



| Reference <sup>a</sup>                       | Sample size, mean age, and diabetes risk criteria                                                                                                          | Active & maintenance phases | Delivery Agent | Intervention description                                                                                                                                                                                        | Weight (kg) | FBG <sup>b</sup> (mg/dl)                                                                | 2-h BG <sup>c</sup> (mg/dl)                                                            | HbA1c <sup>d</sup> (%) |
|----------------------------------------------|------------------------------------------------------------------------------------------------------------------------------------------------------------|-----------------------------|----------------|-----------------------------------------------------------------------------------------------------------------------------------------------------------------------------------------------------------------|-------------|-----------------------------------------------------------------------------------------|----------------------------------------------------------------------------------------|------------------------|
| Watanabe, Yamaoka et al., 2003 <sup>67</sup> | 358 (102+256)<br>Mean age (years): 55<br>1-h PG $\geq$ 10 mmol/l                                                                                           | 12 months /0                | Research staff | IG: information of reducing weight to the desirable level based on “Food Exchange Lists, Dietary Guidance for persons with Diabetes”<br>CG: Subjects were told to avoid gaining weight by dieting and exercise. |             | 12 Mo<br>CG: 2.2% $\pm$ 0.9 <sup>m</sup><br>IG: -0.5% $\pm$ 0.9 <sup>m</sup><br>P=0.153 | 12 Mo<br>CG: 11.2% $\pm$ 3 <sup>m</sup><br>IG: -8.2% $\pm$ 1.9 <sup>m</sup><br>P<0.001 |                        |
| Kosaka, Noda et al., 2005 <sup>68</sup>      | 358 (102+256)<br>Initial BMI<br>no mean age<br>A fasting plasma glucose value <140 mg/dl and 2-h plasma glucose value after a 100g glucose load of 160-239 | 12 months /48 months        | Research staff | IG: reduction of weight to the desirable level based on “Food Exchange Lists, Dietary Guidance for persons with Diabetes”.<br>CG: no gain in weight by dieting and exercise.                                    |             | 48 Mo<br>CG: -0.39 <sup>j</sup><br>IG: -2.18 <sup>j</sup>                               |                                                                                        |                        |

| Reference <sup>a</sup>                               | Sample size, mean age, and diabetes risk criteria             | Active & maintenance phases | Delivery Agent | Intervention description                                                                                                                                             | Weight (kg)                                                                        | FBG <sup>b</sup> (mg/dl)                                                         | 2-h BG <sup>c</sup> (mg/dl)                                                     | HbA1c <sup>d</sup> (%) |
|------------------------------------------------------|---------------------------------------------------------------|-----------------------------|----------------|----------------------------------------------------------------------------------------------------------------------------------------------------------------------|------------------------------------------------------------------------------------|----------------------------------------------------------------------------------|---------------------------------------------------------------------------------|------------------------|
|                                                      | mg/dl.                                                        |                             |                |                                                                                                                                                                      |                                                                                    |                                                                                  |                                                                                 |                        |
| Lindstrom, Ilanne-Parikka et al., 2006 <sup>69</sup> | 522 (265+257)<br>Mean age (years) 55<br>Overweight/I GT       | 12 months /38 months        | Dietitian      | IG: detailed and individualized personal counselling sessions with the study nutritionist.<br>CG: general verbal and written health behavior information at baseline | BL<br>CG: 86.7<br>IG: 85.5<br>P=0.3267<br>12 Mo<br>CG: 84.8<br>IG: 82.2<br>P<0.001 |                                                                                  |                                                                                 |                        |
| Oldroyd, Unwin et al., 2006 <sup>70</sup>            | 54 (30+24)<br>Mean age (years)<br>CG: 57.5<br>IG: 58.2<br>IGT | 6 months/ 18 months         | Dietitian      | IG: written nutrition education material and a graded physical activity plan.<br>CG: no dietary or physical activity                                                 | 6 Mo<br>CG: 0.54±2.2 <sup>j</sup><br>IG: -1.1±2.9 <sup>j</sup><br>P=0.010          | 6 Mo<br>CG: 3.24±19.8 <sup>j, x</sup><br>IG: 0.9±10.8 <sup>j, x</sup><br>P=0.560 | 6 Mo<br>CG: -9±30.6 <sup>j, x</sup><br>IG: -9.9±34.2 <sup>j, x</sup><br>P=0.910 |                        |

| Reference <sup>a</sup>                      | Sample size, mean age, and diabetes risk criteria                                    | Active & maintenance phases | Delivery Agent                | Intervention description                                                                                                                                                     | Weight (kg)                                                                 | FBG <sup>b</sup> (mg/dl)                                                    | 2-h BG <sup>c</sup> (mg/dl) | HbA1c <sup>d</sup> (%)              |
|---------------------------------------------|--------------------------------------------------------------------------------------|-----------------------------|-------------------------------|------------------------------------------------------------------------------------------------------------------------------------------------------------------------------|-----------------------------------------------------------------------------|-----------------------------------------------------------------------------|-----------------------------|-------------------------------------|
|                                             |                                                                                      |                             |                               | advice for the duration of the study.                                                                                                                                        |                                                                             |                                                                             |                             |                                     |
| Barclay, Procter et al., 2008 <sup>74</sup> | 28 (17+11)<br>Mean age (years)<br>CG: 62.3<br>IG: 67.5<br>Overweight/<br>Prediabetic | 6 months / 0                | Nutrition scientist           | IG: diet messages based on the Harvard diet pyramid.<br>CG: standard healthy-eating and dietary advice based on the UK Food Standard Agency's guidelines for a healthy diet. | 6 Mo<br>CG: -0.3±1.36 <sup>j</sup><br>IG: -2.73±3.15 <sup>j</sup><br>P=0.03 | 6 Mo<br>CG: 4.5±12.1 <sup>j</sup><br>IG: -0.36±8.28 <sup>j</sup><br>P=0.049 |                             |                                     |
| Penn, White et al., 2009 <sup>77</sup>      | 102 (51+51)<br>Mean age (years)<br>CG: 57.4<br>IG: 56.8<br>Overweight/I<br>GT        | 3 months/<br>60 months      | Dietitian and physiotherapist | IG: advice from a dietitian and physiotherapist with some group sessions and a regular quarterly newsletter.<br>CG: 'usual care' by their primary care physician.            | 12 Mo<br>CG: 0.01 <sup>j</sup><br>IG: -2.3 <sup>j</sup><br>P=0.007          |                                                                             |                             |                                     |
| Kang, Cho et al., 2010 <sup>78</sup>        | 125 (25+25+75)<br>Mean age                                                           | 3 months/<br>24             | Experienced staff and         | 1-year IG: 5 times of 20-30 min of face-to-face counseling based                                                                                                             | 12 Mo<br>CG: -0.27±2.13 <sup>j</sup>                                        |                                                                             |                             | 12 Mo<br>CG: 0.27±0.65 <sup>j</sup> |

| Reference <sup>a</sup>                                | Sample size, mean age, and diabetes risk criteria                                               | Active & maintenance phases | Delivery Agent       | Intervention description                                                                                                                          | Weight (kg)                                                                                        | FBG <sup>b</sup> (mg/dl)                                                                           | 2-h BG <sup>c</sup> (mg/dl)                             | HbA1c <sup>d</sup> (%)                                                                            |
|-------------------------------------------------------|-------------------------------------------------------------------------------------------------|-----------------------------|----------------------|---------------------------------------------------------------------------------------------------------------------------------------------------|----------------------------------------------------------------------------------------------------|----------------------------------------------------------------------------------------------------|---------------------------------------------------------|---------------------------------------------------------------------------------------------------|
|                                                       | (years)<br>CG: 47.47 ±5.79<br>1-year IG: 45.61 ±6.06<br>2-year IG: 45.84 ±5.17<br>FPG ≥5.6 mmol | months                      | dietitian            | on the participant's health profiles.<br>2-year IG: same as the 1-year IG, but lasts for 2 years<br>CG: general information on health at baseline | IG: -0.32±1.36 <sup>j</sup><br><br>24 Mo<br>CG: -0.27±2.13 <sup>j</sup><br>-0.86±1.92 <sup>j</sup> |                                                                                                    |                                                         | IG: -0.13±0.71 <sup>j</sup><br>24 Mo<br>CG: 0.27±0.65 <sup>j</sup><br>IG: -0.15±0.69 <sup>j</sup> |
| Pimentel, Portero-McLellan et al., 2010 <sup>80</sup> | 51 (21+30)<br>Mean age (years)<br>CG: 59.8±9.2<br>IG: 51.7±14.5<br>Overweight/IGT               | 12 months / 0               | Dietitian            | IG: individual and group counselling with a team of nutritionists and written instructions.<br>CG: no nutritional education                       | BL<br>CG: 76±15<br>IG: 70.65±17<br>12 Mo<br>CG: 76.2±16.2<br>p=0.43<br>IG: 68.2±17.6<br>p<0.00001  | BL<br>CG: 91.7±18.3<br>IG: 105±21.6<br>12 Mo<br>CG: 90.2±28.9<br>p=0.72<br>IG: 90.8±14.2<br>p=0.03 |                                                         | BL<br>CG: 6.5±1.8<br>IG: 6.7±1.8<br>12 Mo<br>CG: 7±2<br>p=0.23<br>IG: 5.1±1.2<br>p=0.006          |
| Moore, Hardie et al., 2011 <sup>82</sup>              | 274 (183+91)<br>Mean age (years): 62.5<br>Family history of diabetes/IGT                        | 6 months/ 0                 | General practitioner | IG: one pre-course individual session and six sessions over 6 months<br>CG: a wait group for the HLC with standard care.                          | BL<br>CG: 82.02±16.27<br>IG: 80.7±16.01<br>6 Mo<br>CG: 81.2 ±17.39                                 | BL<br>CG: 106.4±10.44<br>IG: 105.7±10.44<br>6 Mo<br>CG:                                            | BL<br>CG: 145.4±32.04<br>IG: 152.5±25.02<br>6 Mo<br>CG: |                                                                                                   |

| Reference <sup>a</sup>                     | Sample size, mean age, and diabetes risk criteria                      | Active & maintenance phases | Delivery Agent              | Intervention description                                                                                                                    | Weight (kg)                                                                                     | FBG <sup>b</sup> (mg/dl)                                                                             | 2-h BG <sup>c</sup> (mg/dl)                                                            | HbA1c <sup>d</sup> (%)                                                                       |
|--------------------------------------------|------------------------------------------------------------------------|-----------------------------|-----------------------------|---------------------------------------------------------------------------------------------------------------------------------------------|-------------------------------------------------------------------------------------------------|------------------------------------------------------------------------------------------------------|----------------------------------------------------------------------------------------|----------------------------------------------------------------------------------------------|
|                                            |                                                                        |                             |                             |                                                                                                                                             | IG: 78.11 ±14.98                                                                                | 106.02±15.48<br>IG: 101.88±14.76                                                                     | 143.64±48.2<br>IG: 140.22±41.6                                                         |                                                                                              |
| Nilsen, Bakke et al., 2011 <sup>83</sup>   | 182 (93+89)<br>Mean age (years) 46<br>FINDRISC-score <sup>y</sup> ≥ 9  | 6 months/<br>18 months      | Study physician             | IG: a group-based program, one day each week for six weeks and a new gathering after 12 weeks.<br>CG: usual care from general practitioner. | BL<br>CG: 111.7±22<br>IG: 110.5±22<br>18 Mo<br>CG: 108.7±23<br>p<0.001<br>IG: 108±20<br>P<0.001 | BL<br>CG: 99±14.4<br>IG: 100.8±14.4<br>18 Mo<br>CG: 100.8±12.6<br>p=0.69<br>IG: 104.4±21.6<br>p=0.08 |                                                                                        | BL<br>CG: 5.6±0.4<br>IG: 5.6 ±0.5<br>18 Mo<br>CG: 5.6±0.4<br>p=0.11<br>IG: 5.6±0.5<br>p=0.29 |
| Roumen, Feskens et al., 2011 <sup>84</sup> | 147 (74+73)<br>Mean age (years)<br>CG: 58.8 ±8.4<br>IG: 55 ±6.5<br>IGT | 12 months /<br>60 months    | Researcher and/or dietitian | IG: dietary recommendations based on the Dutch guidelines for a healthy diet.<br>CG: standard care.                                         | BL<br>CG: 84.08±12.06<br>IG: 86.83±13.24<br>12 Mo<br>CG: 83.47±11.38<br>IG: 84.36±13.18         | BL<br>CG: 106.6±12.6<br>IG: 108.2±15.12<br>12 Mo<br>CG: 106.9±11.52<br>IG: 107.3±15.8                | BL<br>CG: 158.4±37.62<br>IG: 159.3±36.18<br>12 Mo<br>CG: 158.22±40.5<br>IG: 148.3±36.7 |                                                                                              |

| Reference <sup>a</sup>                          | Sample size, mean age, and diabetes risk criteria                                                          | Active & maintenance phases | Delivery Agent | Intervention description                                                                                                                                                                           | Weight (kg)                                                                                    | FBG <sup>b</sup> (mg/dl)                                                                 | 2-h BG <sup>c</sup> (mg/dl)                                                              | HbA1c <sup>d</sup> (%) |
|-------------------------------------------------|------------------------------------------------------------------------------------------------------------|-----------------------------|----------------|----------------------------------------------------------------------------------------------------------------------------------------------------------------------------------------------------|------------------------------------------------------------------------------------------------|------------------------------------------------------------------------------------------|------------------------------------------------------------------------------------------|------------------------|
| Sakane, Sato et al., 2011 <sup>85</sup>         | 296 (150+146)<br>Mean age (years)<br>CG: 51±6<br>IG: 51±7<br>IGT                                           | 6 months/<br>36 months      | Study nurse    | IG: Four group sessions using slides, video tapes and a booklet with each session lasting two or three hours.<br>CG: only one group session on prevention of diabetes at the baseline.             | BL<br>CG: 63.9±11.7<br>IG: 64.9±12.9<br>12 Mo<br>CG: 63.1±11.7<br>IG: 63.5±12.9<br>P=0.023     | BL<br>CG: 109.8±9<br>IG: 106.2±9<br>12 Mo<br>CG: 106.2±10.8<br>IG: 104.4±10.8<br>P=0.698 | BL<br>CG: 162±16.2<br>IG: 165.6±16.2<br>12 Mo<br>CG: 149.4±36<br>IG: 144±37.8<br>P=0.083 |                        |
| Salas-Salvadó, Bulló et al., 2011 <sup>86</sup> | 418 (139+145+134)<br>Age range: 55-80<br>Overweight/<br>Family history of premature cardiovascular disease | 12 months /<br>48 months    | Dietitian      | IG1: MedDiets with extra virgin olive oil<br>IG2: MedDiets with mixed nuts with personalized dietary advice by dietitian.<br>CG: Low-fat control diet on cardiovascular and other chronic disease. | 60 Mo<br>IG1: -0.2±4.6 <sup>j</sup><br>IG2: -0.6±4.2 <sup>j</sup><br>CG: -0.6±4.3 <sup>j</sup> |                                                                                          |                                                                                          |                        |

| Reference <sup>a</sup>                        | Sample size, mean age, and diabetes risk criteria                                                | Active & maintenance phases | Delivery Agent                     | Intervention description                                                                                                                                                                | Weight (kg)                                                                                                                       | FBG <sup>b</sup> (mg/dl)                                                                                                               | 2-h BG <sup>c</sup> (mg/dl)                                                                                                              | HbA1c <sup>d</sup> (%)                                              |
|-----------------------------------------------|--------------------------------------------------------------------------------------------------|-----------------------------|------------------------------------|-----------------------------------------------------------------------------------------------------------------------------------------------------------------------------------------|-----------------------------------------------------------------------------------------------------------------------------------|----------------------------------------------------------------------------------------------------------------------------------------|------------------------------------------------------------------------------------------------------------------------------------------|---------------------------------------------------------------------|
| Vermunt, Milder et al., 2012 <sup>88</sup>    | 925 (479+446)<br>Age range (years) 40-70<br>FINDRISC-score ≥13                                   | 6 months/0                  | General practitioner and dietitian | IG: 11 consultations of 20 min over 2.5 years alternatively with the nurse practitioner and the general practitioner. CG: oral and written information about T2D and healthy lifestyle. | 6 Mo<br>CG: -0.5±3.0 <sup>j</sup><br>IG: -0.8±3.3 <sup>j</sup><br>18 Mo<br>CG: -0.3±4.5 <sup>j</sup><br>IG: -0.6±5.1 <sup>j</sup> | 6 Mo<br>CG: -1.8±7.2 <sup>j</sup><br>IG: -1.44±7.4 <sup>j</sup><br>18 Mo<br>CG: -1.44±8.28 <sup>j</sup><br>IG: -0.09±7.38 <sup>j</sup> | 6 Mo<br>CG: -2.52±26.8 <sup>j</sup><br>IG: -0.72±24.7 <sup>j</sup><br>18 Mo<br>CG: 3.06±28.08 <sup>j</sup><br>IG: 2.16±26.8 <sup>j</sup> |                                                                     |
| Admiraal, Vlaar et al., 2013 <sup>89</sup>    | 355 (177+158)<br>Mean age (years) 44.9 ±10.1<br>IGT/IFG                                          | 6 months/6 months           | Trained dietitians                 | IG: six to eight sessions in the first 6 months with two booster sessions in the next 6 months. CG: Two group sessions led by student dietitians.                                       | 12 Mo<br>CG: 0.4±3.1 <sup>j</sup><br>IG: -0.2±3.3 <sup>j</sup><br>P=0.08                                                          | 12 Mo<br>CG: -9±14.4 <sup>j</sup><br>IG: -9±16.2 <sup>j</sup><br>P=0.66                                                                |                                                                                                                                          | 12 Mo<br>CG: 0±0.4 <sup>j</sup><br>IG: 0±0.3 <sup>j</sup><br>P=0.99 |
| Sangeetha, Fatimah et al., 2013 <sup>90</sup> | 62 (29+33)<br>Mean age (years) CG: 31.5 ±4.5<br>IG: 30.9 ±4.3<br>History of gestational diabetes | 6 months / 0                | Research dietitian                 | IG: glycemic index (GI)-education, how to substitute high GI foods with low GI options. CG: conventional healthy dietary recommendation.                                                | BL<br>IG: 65.3±11.5<br>CG: 64.6±12.5<br>3 Mo<br>IG: 64.6±11.5<br>CG: 64.7±12.6<br>6 Mo<br>IG: 64±11.7                             |                                                                                                                                        |                                                                                                                                          |                                                                     |

| Reference <sup>a</sup>                                       | Sample size, mean age, and diabetes risk criteria                                                                                        | Active & maintenance phases | Delivery Agent     | Intervention description                                                                                                                                                | Weight (kg)                                                                  | FBG <sup>b</sup> (mg/dl)                                                     | 2-h BG <sup>c</sup> (mg/dl)                                                                      | HbA1c <sup>d</sup> (%)                                                                    |
|--------------------------------------------------------------|------------------------------------------------------------------------------------------------------------------------------------------|-----------------------------|--------------------|-------------------------------------------------------------------------------------------------------------------------------------------------------------------------|------------------------------------------------------------------------------|------------------------------------------------------------------------------|--------------------------------------------------------------------------------------------------|-------------------------------------------------------------------------------------------|
|                                                              |                                                                                                                                          |                             |                    |                                                                                                                                                                         | CG:64.5±13                                                                   |                                                                              |                                                                                                  |                                                                                           |
| Telle-Hjellset, Raberg Kjollesdal et al., 2013 <sup>91</sup> | 198 (101+97)<br>Mean age (years)<br>CG: 42<br>IG: 41<br>Metabolic syndrome                                                               | 7 months/0                  | Research personnel | IG: six 2-hour educational sessions on the benefits of light physical activity<br>CG: feedback on blood sugar levels with lifestyle advice in one single group session. |                                                                              |                                                                              | 7 Mo<br>CG: -3.96 (-9.9, 1.98) <sup>j</sup><br>IG: -9.54 (-15.12, -3.78) <sup>j</sup><br>P=0.186 | 7 Mo<br>CG: 0.05 (-0.04, 0.15) <sup>j</sup><br>IG: 0.04 (0, 0.09) <sup>j</sup><br>P=0.878 |
| Xu, Sun et al., 2013 <sup>92</sup>                           | 88 (46+42)<br>Mean age (years)<br>IG: 60.35±9.8<br>CG: 56.55±8.6<br>BMI≥18.5 kg/m <sup>2</sup> /fasting plasma glucose of 5.6-6.9 mmol/l | 3 months/9 months           | Study dietitian    | IG: a daily meal replacement and intensive lifestyle intervention.<br>CG: an educational lecture on balanced diet, regular exercise and how to control blood glucose.   | 12 Mo<br>CG: -0.55±0.4 <sup>j</sup><br>IG: -1.75±0.35 <sup>j</sup><br>P=0.02 | 12 Mo<br>CG: 6.84±1.62 <sup>j</sup><br>IG: -2.16±1.8 <sup>j</sup><br>P=0.001 | 12 Mo<br>CG: 15.3±15.48 <sup>j</sup><br>IG: -22.32±6.3 <sup>j</sup><br>P=0.02                    | 12 Mo<br>CG: 0.07±0.08 <sup>j</sup><br>IG: -0.12±0.04 <sup>j</sup><br>P=0.02              |



| Reference <sup>a</sup>                        | Sample size, mean age, and diabetes risk criteria                                                       | Active & maintenance phases | Delivery Agent                | Intervention description                                                                                                                                                    | Weight (kg)                                                   | FBG <sup>b</sup> (mg/dl)                                                       | 2-h BG <sup>c</sup> (mg/dl)                                | HbA1c <sup>d</sup> (%)                                            |
|-----------------------------------------------|---------------------------------------------------------------------------------------------------------|-----------------------------|-------------------------------|-----------------------------------------------------------------------------------------------------------------------------------------------------------------------------|---------------------------------------------------------------|--------------------------------------------------------------------------------|------------------------------------------------------------|-------------------------------------------------------------------|
| Bhopal, Douglas et al., 2014 <sup>93</sup>    | 171(85+86)<br>Mean age (years)<br>CG: 52.2 ±10.3<br>IG: 52.8 ±10.2<br>IGT/IFG                           | 3 months/<br>36 months      | Dietitian                     | IG: consultation with a dietitian throughout the study. Families had 15 visits from a dietitian over 3 years. CG: standardized written and verbal advice.                   | 36 Mo<br>-1.64 <sup>u</sup><br>(-2.83, -0.44)<br>P=0.01       | 36 Mo<br>-2.34 <sup>u</sup><br>(-7.02, 2.34)<br>P=0.3361                       | 36 Mo<br>-10.08 <sup>u</sup><br>(-23.76, 3.42)<br>P=0.1428 |                                                                   |
| Parker, Byham-Gray et al., 2014 <sup>96</sup> | 81 (43+38)<br>Mean age (years)<br>IG: 51.1 ±12.36<br>CG: 49.61 ±15.6<br>Overweight/IFG                  | 3 months/<br>3 months       | RD                            | IG: medical nutrition therapy based on the American Diabetes Association Standards Medical Care by a registered dietitian nutritionist. CG: usual care                      |                                                               | 3 Mo<br>IG: -1.66±17.16 <sup>j</sup><br>CG: -1.97±17.67 <sup>j</sup><br>P=0.94 |                                                            |                                                                   |
| Dawes, Ashe et al., 2015 <sup>98</sup>        | 56(33+23)<br>No mean age<br>A1C is between 5.7% to 6.4%/<br>Fasting blood glucose is between 6.1 to 6.9 | 6 months<br>/0              | Lifestyle change facilitators | IG: Facilitators made telephone calls twice per months for 6 months to aid the participants in forming attaining goals according to intervention manual. CG: Usual care was | 6 Mo<br>IG:-3.4±3.1 <sup>j</sup><br>CG: -0.3±1.8 <sup>j</sup> |                                                                                |                                                            | 6 Mo<br>IG: -0.07±0.21 <sup>j</sup><br>CG: 0.03±0.24 <sup>j</sup> |

| Reference <sup>a</sup>                     | Sample size, mean age, and diabetes risk criteria                   | Active & maintenance phases | Delivery Agent       | Intervention description                                                                                                                                                             | Weight (kg)                                                        | FBG <sup>b</sup> (mg/dl)                                               | 2-h BG <sup>c</sup> (mg/dl)                                          | HbA1c <sup>d</sup> (%) |
|--------------------------------------------|---------------------------------------------------------------------|-----------------------------|----------------------|--------------------------------------------------------------------------------------------------------------------------------------------------------------------------------------|--------------------------------------------------------------------|------------------------------------------------------------------------|----------------------------------------------------------------------|------------------------|
|                                            | mmol/L/2-hour 75 g oral glucose is between 7.8 to 11.0 mmol/l       |                             |                      | offered.                                                                                                                                                                             |                                                                    |                                                                        |                                                                      |                        |
| Schmiedel, Mayr et al., 2015 <sup>99</sup> | 1092(530+562)<br>Mean age (years): 57.5 ±11.3<br>FINDRISC-score ≥ 7 | 12 months / 0               | Pharmacists          | IG: three individual counseling sessions and five group-based lectures lasted 75–90 min (program GLICEMIA).<br>CG: Only assessment and information about health status was provided. | 12 Mo<br>IG: -1.52±3.84 <sup>j</sup><br>CG: 0.11±3.58 <sup>j</sup> |                                                                        |                                                                      |                        |
| Non-US studies with QED design             |                                                                     |                             |                      |                                                                                                                                                                                      |                                                                    |                                                                        |                                                                      |                        |
| Absetz, Valve et al., 2007 <sup>71</sup>   | 352<br>Mean age (years)<br>Female: 58 ±4.3<br>Male : 59 ±3.7        | 12 months / 0               | Public health nurses | Information on self-monitoring of behavior, goal setting and planning with group discussions facilitated by nurses or a physiotherapist.                                             | BL<br>Female:<br>86±13.2<br>Male:<br>100±18.1<br>12 Mo<br>Female:  | BL<br>Female:<br>100.8±14.4<br>Male:<br>106.2±12.6<br>12 Mo<br>Female: | BL<br>Female:<br>117±30.6<br>Male:<br>124.2±32.4<br>12 Mo<br>Female: |                        |

| Reference <sup>a</sup>                         | Sample size, mean age, and diabetes risk criteria                       | Active & maintenance phases | Delivery Agent                     | Intervention description                                                                                                                        | Weight (kg)                                                                                   | FBG <sup>b</sup> (mg/dl)                                                                | 2-h BG <sup>c</sup> (mg/dl)                    | HbA1c <sup>d</sup> (%) |
|------------------------------------------------|-------------------------------------------------------------------------|-----------------------------|------------------------------------|-------------------------------------------------------------------------------------------------------------------------------------------------|-----------------------------------------------------------------------------------------------|-----------------------------------------------------------------------------------------|------------------------------------------------|------------------------|
|                                                | The diabetes risk score $\geq$ 12                                       |                             |                                    |                                                                                                                                                 | 85.5 $\pm$ 13.3<br>Male:<br>98.5 $\pm$ 18.1                                                   | 102.6 $\pm$ 12.6<br>Male:<br>109.8 $\pm$ 14.4                                           | 118.8 $\pm$ 34.2<br>Male:<br>122.4 $\pm$ 41.4  |                        |
| Kilkkinen, Heistaro et al., 2007 <sup>72</sup> | 248<br>Mean age (years) 57.4<br>The diabetes risk score $\geq$ 12       | 12 months / 0               | Trained study nurses and dietitian | Six group counseling sessions of dietary and physical activity guidance facilitated by trained study nurses, a dietitian and a physiotherapist. | 3 Mo<br>-2.25 <sup>j</sup><br>P=0.001                                                         | 0.005 <sup>j,x</sup><br>P<0.386                                                         |                                                |                        |
| Laatikainen, Dunbar et al., 2007 <sup>73</sup> | 311<br>Mean age (years) 56.7 $\pm$ 8.7<br>Diabetes Risk Score $\geq$ 12 | 8 months/ 4 months          | Study nurses and dietitians        | Six structured 90-minute group sessions over 8 months using the Health Action Process Approach.                                                 | 3 Mo<br>-2.38 <sup>j</sup><br>(-2.79, -1.98)<br>12 Mo<br>-2.52 <sup>j</sup><br>(-3.19, -1.85) | 3 Mo<br>0 <sup>j</sup><br>(-1.26, 1.44)<br>12 Mo<br>-2.52 <sup>j</sup><br>(-3.6, -1.26) | 12 Mo<br>-10.44 <sup>j</sup><br>(-14.2, -6.48) |                        |

| Reference <sup>a</sup>                          | Sample size, mean age, and diabetes risk criteria                                             | Active & maintenance phases | Delivery Agent       | Intervention description                                                                                                                 | Weight (kg)                                                                                           | FBG <sup>b</sup> (mg/dl)                | 2-h BG <sup>c</sup> (mg/dl)    | HbA1c <sup>d</sup> (%) |
|-------------------------------------------------|-----------------------------------------------------------------------------------------------|-----------------------------|----------------------|------------------------------------------------------------------------------------------------------------------------------------------|-------------------------------------------------------------------------------------------------------|-----------------------------------------|--------------------------------|------------------------|
| Botomino, Bruppacher et al., 2008 <sup>75</sup> | 1370<br>Mean age (years)<br>59.9± 11<br>Overweight                                            | 3 months/<br>12 months      | Pharmacists          | IG: intensive individualized advices on weight reduction, nutrition habits and physical activity.<br>CG: Standard interventions.         | BL<br>CG: 77.9±10.4<br>IG: 83.6±11.5<br>12 Mo<br>CG: 76.8±10.6<br>p<0.001<br>IG: 81.2±11.5<br>p<0.001 |                                         |                                |                        |
| Absetz, Oldenburg et al., 2009 <sup>76</sup>    | 352<br>Mean age (years)<br>Female:<br>58 ±4.3<br>Male :<br>59 ±3.7<br>Diabetes Risk Score ≥12 | 8 months/<br>36 months      | Public health nurses | Information on self-monitoring of behavior, goal setting and planning with group discussions facilitated by nurses or a physiotherapist. | 36 Mo<br>-0.5±2.1 <sup>j</sup><br>P=0.002                                                             | 36 Mo<br>0±14.4 <sup>j</sup><br>P<0.001 | 36 Mo<br>1.8±34.2 <sup>j</sup> |                        |
| Makrilakis, Liatis et al., 2010 <sup>79</sup>   | 191<br>Mean age (years)<br>56.3 ±10.8<br>FINDRISC-score ≥15                                   | 12 months / 0               | RD                   | Six sessions held by a RD at the area of the participants' residence or work.                                                            | 12 Mo<br>1±4.7 <sup>j</sup><br>P=0.022                                                                |                                         |                                |                        |

| Reference <sup>a</sup>                                  | Sample size, mean age, and diabetes risk criteria                    | Active & maintenance phases | Delivery Agent | Intervention description                                                                                                                                  | Weight (kg)                                                                                                                               | FBG <sup>b</sup> (mg/dl)                                                                                    | 2-h BG <sup>c</sup> (mg/dl)                                                                                 | HbA1c <sup>d</sup> (%) |
|---------------------------------------------------------|----------------------------------------------------------------------|-----------------------------|----------------|-----------------------------------------------------------------------------------------------------------------------------------------------------------|-------------------------------------------------------------------------------------------------------------------------------------------|-------------------------------------------------------------------------------------------------------------|-------------------------------------------------------------------------------------------------------------|------------------------|
| Gilis-Januszewska, Szybinski et al., 2011 <sup>81</sup> | 175 Middle-aged FINDRISC-score $\geq 14$                             | 4 months/8 months           | Trained nurses | 10 group sessions on lifestyle changes, diet and physical activity education. Six telephone motivation sessions and two motivation letters were followed. | 12 Mo<br>1.92 $\pm$ 5.01 <sup>j</sup><br>P<0.05                                                                                           | 12 Mo<br>-1.98 $\pm$ 12.96 <sup>j</sup>                                                                     | 12 Mo<br>-5.58 $\pm$ 42.3 <sup>j</sup>                                                                      |                        |
| Kontogianni, Liatis et al., 2012 <sup>87</sup>          | 112 (71+41) Mean age (years) 56.3 $\pm$ 10.8 FINDRISC-score $\geq 9$ | 12 months /0                | RD             | 6 group-based sessions offered by a RD at the area of the participants' residence or work.                                                                | 12 Mo<br>Improved group (IG):<br>-1.73 $\pm$ 5.2 <sup>j</sup><br>p=0.007<br>Worsened group(WG):<br>0.24 $\pm$ 4.0 <sup>j</sup><br>p=0.704 | 12 Mo<br>IG: -<br>3.41 $\pm$ 12.7 <sup>j</sup><br>p=0.027<br>WG:<br>4.13 $\pm$ 38.8 <sup>j</sup><br>p=0.505 | 12 Mo<br>IG: -<br>2.65 $\pm$ 32.2 <sup>j</sup><br>p=0.49<br>WG:<br>15.53 $\pm$ 70.8 <sup>j</sup><br>p=0.173 |                        |
| Duijzer, Haveman-Nies et al., 2014 <sup>94</sup>        | 31 Mean age (years) 54.1 $\pm$ 8.5 IFG                               | 10 months /0                | Dietitian      | Tailored dietary advices during individual consultations and one group session.                                                                           | 10 Mo<br>-3.5 $\pm$ 5.4 <sup>j</sup><br>P=0.005                                                                                           | 10 Mo<br>5.4 $\pm$ 14.4 <sup>j</sup><br>P=0.062                                                             |                                                                                                             |                        |

| Reference <sup>a</sup>                         | Sample size, mean age, and diabetes risk criteria                          | Active & maintenance phases | Delivery Agent      | Intervention description                                                                                                         | Weight (kg)                                                                                          | FBG <sup>b</sup> (mg/dl) | 2-h BG <sup>c</sup> (mg/dl) | HbA1c <sup>d</sup> (%) |
|------------------------------------------------|----------------------------------------------------------------------------|-----------------------------|---------------------|----------------------------------------------------------------------------------------------------------------------------------|------------------------------------------------------------------------------------------------------|--------------------------|-----------------------------|------------------------|
| Dunbar, Jayawardena et al., 2014 <sup>95</sup> | 3114<br>Mean age (years)<br>61.3 ± 0.1<br>AUSDRISK-score <sup>z</sup> ≥ 12 | 8 months / 0                | Trained facilitator | A group-course six-session intensive for 8-15 people followed by sixth intervention session at 8 months after the first session. | BL<br>86.5±0.3<br>8 Mo<br>84.2±0.3<br>P<0.001                                                        |                          |                             |                        |
| Weir, Johnson et al., 2014 <sup>97</sup>       | 45<br>Mean age (years)<br>58.6 ±8.2<br>Prediabetic                         | 6 months/ 0                 | Dietitian           | A 3-hour dietitian-led pre-diabetes education session on how to prevent or delay type 2 diabetes.                                | BMI (kg/m <sup>2</sup> ) <sup>f</sup><br>BL: 31.6±6.7<br>3 Mo: 31.6±7.2<br>6 Mo: 31.0±6.9<br>P=0.798 |                          |                             |                        |

<sup>a</sup> Each study is identified by author and year.

<sup>b</sup> FBG=Fasting blood glucose

<sup>c</sup> 2-h BG=2-hour blood glucose

<sup>d</sup> HbA1c=Hemoglobin A1c

<sup>e</sup> RCT=Randomized control trial

<sup>f</sup> sample size of intervention group+ sample size of control group

<sup>g</sup> IG=Intervention group

<sup>h</sup> CG=Control group

<sup>i</sup> Mo=month

<sup>j</sup> Change in outcome over time.

<sup>k</sup> BMI=body mass index

<sup>l</sup> ADA score=American Diabetes Association (ADA) risk assessment score

<sup>m</sup> Percent change is reported in the study

<sup>n</sup> IVR=Interactive voice response

<sup>o</sup> Prediabetes is defined as fasting blood glucose between 100 to125 mg/dl

- <sup>p</sup> BL= baseline
- <sup>q</sup> Pound is converted to kilogram
- <sup>r</sup> IGT=Impaired glucose tolerance
- <sup>s</sup> RD=Registered dietitian
- <sup>t</sup> CHW=Community health worker
- <sup>u</sup> Between-group difference
- <sup>v</sup> QED=Quasi-experimental design
- <sup>w</sup> CHA=Community health advocates
- <sup>x</sup> mmol/l is converted to mg/dl.
- <sup>y</sup> FINDRISC=Finnish Diabetes Risk score
- <sup>z</sup> AUSDRISK=The Australian diabetes risk tool
- <sup>†</sup> Only BMI is reported.

**Supplementary Table 4. The effectiveness of lifestyle intervention including nutrition education for diabetes prevention: mean difference (intervention group compared to control group) in outcomes by subgroups (delivery agent and delivery channel)**

| Outcome             | 3 months                                            |                                        | 6 months                               |                                        | 12 months                                 |                                        | 13-60 months                              |                                        |
|---------------------|-----------------------------------------------------|----------------------------------------|----------------------------------------|----------------------------------------|-------------------------------------------|----------------------------------------|-------------------------------------------|----------------------------------------|
| Delivery Agent      |                                                     |                                        |                                        |                                        |                                           |                                        |                                           |                                        |
|                     | Dietitian                                           | Non-dietitian                          | Dietitian                              | Non-dietitian                          | Dietitian                                 | Non-dietitian                          | Dietitian                                 | Non-dietitian                          |
| Weight              | -3.46 <sup>***</sup><br>(-4.88, -2.03) <sup>a</sup> | -2.85 <sup>***</sup><br>(-4.13, -1.56) | -2.91 <sup>**</sup><br>(-5.44, -0.38)  | -2.14 <sup>***</sup><br>(-2.67, -1.61) | -1.90 <sup>***</sup><br>(-2.73, -1.06)    | -2.23 <sup>***</sup><br>(-2.99, -1.46) | -1.47 <sup>**</sup><br>(-2.36, -0.58)     | -0.68 <sup>**b</sup><br>(-1.20, -0.17) |
| FBG <sup>c</sup>    | -2.12<br>(-4.78, 0.55)                              | -3.72 <sup>***</sup><br>(-4.85, -2.58) | -2.32 <sup>b,d</sup><br>(-7.00, 2.36)  | -4.59 <sup>***</sup><br>(-7.65, -1.54) | -2.84 <sup>***</sup><br>(-3.10, -2.58)    | -1.57<br>(-3.20, 0.07)                 | -2.17 <sup>**</sup><br>(-3.12, -1.23)     | 0.43 <sup>d</sup><br>(-1.07, 1.94)     |
| 2-h BG <sup>e</sup> | -                                                   | -                                      | -                                      | -                                      | -9.73<br>(-21.52, 2.06)                   | -2.98<br>(-7.42, 1.47)                 | -3.70 <sup>***b,d</sup><br>(-7.14, -0.26) | 0.73 <sup>d</sup><br>(-3.07, 4.52)     |
| HbA1c <sup>f</sup>  | -                                                   | -0.13 <sup>d</sup><br>(-0.67, 0.41)    | -                                      | 0.00 <sup>b</sup><br>(-0.01, 0.01)     | -0.27 <sup>***</sup><br>(-0.47, -0.07)    | -0.15<br>(-0.30, 0.01)                 | -0.23 <sup>d</sup><br>(-0.33, -0.12)      | -                                      |
| Delivery Channel    |                                                     |                                        |                                        |                                        |                                           |                                        |                                           |                                        |
|                     | IP <sup>g</sup>                                     | TECH <sup>h</sup>                      | IP                                     | TECH                                   | IP                                        | TECH                                   | IP                                        | TECH                                   |
| Weight              | -3.30 <sup>***</sup><br>(-4.60, -1.99)              | -2.83 <sup>***</sup><br>(-4.66, -1.00) | -2.41 <sup>***</sup><br>(-3.43, -1.39) | -2.83 <sup>***</sup><br>(-4.57, -1.09) | -1.89 <sup>***</sup><br>(-2.43, -1.35)    | -2.69 <sup>***</sup><br>(-4.49, -0.90) | -1.17 <sup>**</sup><br>(-1.95, -0.39)     | -0.74 <sup>d</sup><br>(-1.53, 0.05)    |
| FBG                 | -3.11 <sup>***</sup><br>(-4.97, -1.24)              | -2.28<br>(-7.68, 3.11)                 | -4.22 <sup>***</sup><br>(-6.89, -1.55) | -                                      | -1.91<br>(-2.95, -0.87)                   | -3.89 <sup>***</sup><br>(-6.46, -1.32) | -2.01 <sup>**</sup><br>(-3.54, -0.48)     | -                                      |
| 2-h BG              | -                                                   | -                                      | -0.27<br>(-3.54, 3.00)                 | -                                      | -6.83<br>(-17.18, 3.52)                   | -9.59 <sup>d</sup><br>(-14.6, -4.62)   | -2.77 <sup>b,d</sup><br>(-7.14, 1.61)     | -                                      |
| HbA1c               | -                                                   | -0.13 <sup>d</sup><br>(-0.67, 0.41)    | 0.00<br>(-0.01, 0.01)                  | -                                      | -0.14 <sup>***b,d</sup><br>(-0.23, -0.04) | -                                      | -0.17 <sup>d</sup><br>(-0.37, 0.02)       | -                                      |

<sup>a</sup> The 95% confidence intervals are in the parenthesis.

<sup>b</sup> Indicates that fixed-effect model was used to calculate the summary mean difference in outcomes.

<sup>c</sup> FBG=Fasting blood glucose

<sup>d</sup> The number of studies is less than 4.

<sup>e</sup> 2-h BG=2-hour blood glucose

<sup>f</sup> HbA1c=Hemoglobin A1c

<sup>g</sup> IP=In-person intervention



<sup>h</sup> TECH=Technology-delivered intervention with/without in-person contact.

\* Statistical significance at 10% level

\*\* Statistical significance at 5% level.

\*\*\* Statistical significance at 1% level.

- Insufficient data for analysis

**Supplementary Table 5. The effectiveness of lifestyle intervention including nutrition education for diabetes prevention: effect sizes according to study design (randomized controlled trial vs quasi-experimental design) and study location (US vs Non-US) over time, in the active intervention and overall (active + maintenance study phases)**

| Outcome                          | 3 months                                            |                                        | 6 months                               |                                         | 12 months                              |                                       | 13-60 months |        |
|----------------------------------|-----------------------------------------------------|----------------------------------------|----------------------------------------|-----------------------------------------|----------------------------------------|---------------------------------------|--------------|--------|
| <b>Active Intervention Phase</b> |                                                     |                                        |                                        |                                         |                                        |                                       |              |        |
| Study Design                     |                                                     |                                        |                                        |                                         |                                        |                                       |              |        |
|                                  | RCT <sup>a</sup>                                    | QED <sup>b</sup>                       | RCT                                    | QED                                     | RCT                                    | QED                                   | RCT          | QED    |
| Weight                           | -0.37 <sup>***</sup><br>(-0.64, -0.09) <sup>c</sup> | -0.2 <sup>***</sup><br>(-0.26, -0.14)  | -1.02 <sup>***</sup><br>(-1.95, -0.08) | -0.07 <sup>***d</sup><br>(-0.08, -0.07) | -0.45 <sup>***</sup><br>(-0.65, -0.26) | -0.04 <sup>**</sup><br>(-0.08, 0.01)  | -            | -      |
| FBG <sup>e</sup>                 | -0.33 <sup>***</sup><br>(-0.55, -0.11)              | -0.22 <sup>***</sup><br>(-0.41, -0.03) | -0.86<br>(-2.37, 0.65)                 | -                                       | -0.87<br>(-1.82, 0.08)                 | 0.05<br>(-0.17, 0.28)                 | -            | -      |
| 2-h BG <sup>f</sup>              | -                                                   | -                                      | -0.03<br>(-0.14, 0.09)                 | -                                       | -2.17<br>(-5.45, 1.11)                 | 0.02<br>(-0.05, 0.1)                  | -            | -      |
| HbA1c <sup>g</sup>               | -0.11 <sup>h</sup><br>(-0.84, 1.07)                 | -                                      | -0.16<br>(-0.37, 0.04)                 | -                                       | -0.69 <sup>d,h</sup><br>(-1.52, 0.14)  | -                                     | -            | -      |
| Study Location                   |                                                     |                                        |                                        |                                         |                                        |                                       |              |        |
|                                  | US                                                  | NON-US                                 | US                                     | NON-US                                  | US                                     | NON-US                                | US           | NON-US |
| Weight                           | -0.24 <sup>***</sup><br>(-0.29, -0.18)              | -0.19 <sup>***</sup><br>(-0.32, -0.07) | -1.21 <sup>***</sup><br>(-2.56, 0.13)  | -0.39 <sup>***</sup><br>(-0.6, -0.17)   | -0.19 <sup>***</sup><br>(-0.28, -0.09) | -0.07 <sup>***</sup><br>(-0.09, 0.05) | -            | -      |
| FBG                              | -0.35 <sup>***</sup><br>(-0.51, -0.2)               | 0.03<br>(-0.05, 0.11)                  | -1.28<br>(-3.93, 1.36)                 | -0.2<br>(-0.51, 0.11)                   | -                                      | -0.35<br>(-0.78, 0.08)                | -            | -      |
| 2-h BG                           | -                                                   | -                                      | -                                      | -0.03<br>(-0.14, 0.09)                  | -                                      | -0.95<br>(-2.06, 0.16)                | -            | -      |
| HbA1c                            | -0.61 <sup>***d</sup><br>(-0.77, -0.46)             | -                                      | -0.22 <sup>d,h</sup><br>(-0.55, 0.11)  | -0.13 <sup>d,h</sup><br>(-0.39, 0.13)   | -                                      | -0.69 <sup>d,h</sup><br>(-1.52, 0.14) | -            | -      |

| Outcome                           | 3 months                                |                                        | 6 months                               |                                         | 12 months                              |                                       | 13-60 months                            |                                        |
|-----------------------------------|-----------------------------------------|----------------------------------------|----------------------------------------|-----------------------------------------|----------------------------------------|---------------------------------------|-----------------------------------------|----------------------------------------|
| <b>Overall Intervention Phase</b> |                                         |                                        |                                        |                                         |                                        |                                       |                                         |                                        |
| Study Design                      |                                         |                                        |                                        |                                         |                                        |                                       |                                         |                                        |
|                                   | RCT                                     | QED                                    | RCT                                    | QED                                     | RCT                                    | QED                                   | RCT                                     | QED                                    |
| Weight                            | -0.37 <sup>***d</sup><br>(-0.64, -0.09) | -0.2 <sup>***</sup><br>(-0.25, -0.14)  | -0.93 <sup>***</sup><br>(-1.61, -0.24) | -0.07 <sup>***</sup><br>(-0.08, -0.07)  | -0.45 <sup>***</sup><br>(-0.58, -0.32) | -0.13 <sup>***</sup><br>(-0.19, 0.07) | -0.18 <sup>***</sup><br>(-0.36, -0.01)  | -                                      |
| FBG                               | -0.33 <sup>***d</sup><br>(-0.55, -0.11) | -0.25 <sup>**</sup><br>(-0.44, -0.06)  | -0.86<br>(-2.37, 0.65)                 | -1.21 <sup>***h</sup><br>(-1.96, -0.47) | -0.53 <sup>***</sup><br>(-0.89, -0.17) | -0.11<br>(-0.29, 0.06)                | -0.15 <sup>***d</sup><br>(-0.23, -0.07) | -                                      |
| 2-h BG                            | -                                       | -                                      | -0.03 <sup>h</sup><br>(-0.14, 0.09)    | -                                       | -1.25<br>(-2.82, 0.32)                 | 0.02<br>(-0.03, 0.08)                 | -0.13 <sup>***</sup><br>(-0.22, -0.04)  | -                                      |
| HbA1c                             | -0.11<br>(-0.84, 1.07)                  | -                                      | -0.16 <sup>h</sup><br>(-0.37, 0.04)    | -                                       | -0.4 <sup>***</sup><br>(-0.62, -0.18)  | -                                     | -0.29<br>(-0.59, 0.01)                  | -                                      |
| Study Location                    |                                         |                                        |                                        |                                         |                                        |                                       |                                         |                                        |
|                                   | US                                      | NON-US                                 | US                                     | NON-US                                  | US                                     | NON-US                                | US                                      | NON-US                                 |
| Weight                            | -0.24 <sup>***</sup><br>(-0.29, -0.18)  | -0.18 <sup>***</sup><br>(-0.28, -0.09) | -0.85 <sup>***</sup><br>(-1.3, -0.4)   | -0.21 <sup>***</sup><br>(-0.3, -0.13)   | -0.34 <sup>***</sup><br>(-0.48, -0.21) | -0.23 <sup>***</sup><br>(-0.29, 0.17) | -0.49 <sup>***</sup><br>(-0.74, -0.24)  | -0.05 <sup>***</sup><br>(-0.17, 0.07)  |
| FBG                               | -0.37 <sup>***</sup><br>(-0.52, -0.23)  | 0.03 <sup>h</sup><br>(-0.05, 0.11)     | -1.29<br>(-3.47, 0.88)                 | -0.2<br>(-0.51, 0.11)                   | -0.37 <sup>***</sup><br>(-0.57, -0.17) | -0.28 <sup>***</sup><br>(-0.54, 0.03) | -                                       | -0.09 <sup>**h</sup><br>(-0.16, -0.02) |
| 2-h BG                            | -0.20 <sup>h</sup><br>(-0.96, 0.55)     | -                                      | -                                      | -0.03 <sup>d,h</sup><br>(-0.14, 0.09)   | -0.22 <sup>d,h</sup><br>(-0.68, 0.23)  | -0.68 <sup>***</sup><br>(-1.32, 0.04) | -                                       | -0.06 <sup>h</sup><br>(-0.14, 0.01)    |
| HbA1c                             | -0.61 <sup>**</sup><br>(-0.77, -0.46)   | -                                      | -0.22 <sup>h</sup><br>(-0.55, 0.11)    | -0.13 <sup>h</sup><br>(-0.39, 0.13)     | -0.15 <sup>***</sup><br>(-0.20, 0.10)  | -0.44 <sup>**</sup><br>(-0.74, 0.13)  | -                                       | -0.28 <sup>h</sup><br>(-0.43, 0.13)    |

<sup>a</sup> RCT=Randomized control trial

- <sup>b</sup> QED=Quasi-experimental design
  - <sup>c</sup> The 95% confidence intervals are in the parenthesis.
  - <sup>d</sup> Indicates that fixed-effect model was used to calculate the summary mean difference in outcomes.
  - <sup>e</sup> FBG=fasting blood glucose
  - <sup>f</sup> 2-h BG=2-hour blood glucose
  - <sup>g</sup> HbA1c=hemoglobin A1c
  - <sup>h</sup> The number of studies is less than 4.
- 
- \* Statistical significance at 10% level
  - \*\* Statistical significance at 5% level.
  - \*\*\* Statistical significance at 1% level.
  - Insufficient data for meta-analysis

**Supplementary Table 6. The effectiveness of lifestyle intervention including nutrition education for diabetes prevention: mean difference (intervention group compared to control group) in outcomes by subgroups (design and locations)**

| Outcome             | 3 months                                            |                                        | 6 months                               |                                         | 12 months                                 |                                          | 13-60 months                            |                                         |
|---------------------|-----------------------------------------------------|----------------------------------------|----------------------------------------|-----------------------------------------|-------------------------------------------|------------------------------------------|-----------------------------------------|-----------------------------------------|
| Design              | RCT <sup>a</sup>                                    | QED <sup>b</sup>                       | RCT                                    | QED                                     | RCT                                       | QED                                      | RCT                                     | QED                                     |
| Weight              | -1.74 <sup>***</sup><br>(-3.06, -0.41) <sup>c</sup> | -3.98 <sup>***</sup><br>(-5.21, -2.75) | -2.66 <sup>***</sup><br>(-4.02, -1.31) | -2.38 <sup>***</sup><br>(-2.54, -2.22)  | -1.89 <sup>***</sup><br>(-2.52, -1.26)    | -2.38 <sup>***</sup><br>(-3.46, -1.30)   | -1.21 <sup>***</sup><br>(-1.97, -0.46)  | -                                       |
| FBG <sup>d</sup>    | -4.39 <sup>***e,f</sup><br>(-6.93, -1.85)           | -2.72 <sup>***</sup><br>(-4.60, -0.84) | -3.32 <sup>***</sup><br>(-6.11, -0.54) | -4.41 <sup>***e</sup><br>(-6.28, -2.53) | -3.22 <sup>***</sup><br>(-4.55, -1.88)    | -1.36<br>(-3.23, 0.52)                   | -2.04 <sup>***</sup><br>(-3.78, -0.30)  | -                                       |
| 2-h BG <sup>g</sup> | -                                                   | -                                      | -0.27 <sup>e</sup><br>(-3.54, 3.00)    | -                                       | -14.05 <sup>***e</sup><br>(-22.74, -5.37) | 1.02 <sup>e,f</sup><br>(-1.00, 3.04)     | -3.88 <sup>***e</sup><br>(-7.13, -0.64) | -                                       |
| HbA1c <sup>h</sup>  | -0.03 <sup>***e</sup><br>(-0.46, -0.40)             | -                                      | 0.00<br>(-0.01, 0.01)                  | -                                       | -0.14<br>(-0.23, -0.04)                   | -                                        | -0.17 <sup>e</sup><br>(-0.37, 0.02)     | -                                       |
| Location            | US                                                  | Non-US                                 | US                                     | Non-US                                  | US                                        | Non-US                                   | US                                      | Non-US                                  |
| Weight              | -3.55 <sup>***</sup><br>(-4.72, -2.38)              | -1.84 <sup>***</sup><br>(-2.47, -1.22) | -3.06 <sup>***</sup><br>(-4.60, -1.53) | -1.82 <sup>***</sup><br>(-2.57, -1.06)  | -2.79 <sup>***</sup><br>(-3.98, -1.60)    | -1.58 <sup>***</sup><br>(-2.04, -1.12)   | -3.41 <sup>***</sup><br>(-4.34, -2.48)  | -0.55 <sup>***</sup><br>(-1.07, -0.03)  |
| FBG                 | -3.65 <sup>***</sup><br>(-4.83, -2.48)              | 0.05 <sup>e,f</sup><br>(-0.06, 0.17)   | -4.50 <sup>***</sup><br>(-7.64, -1.36) | -2.48 <sup>e,f</sup><br>(-6.24, 1.29)   | -3.16 <sup>***</sup><br>(-5.00, -1.31)    | -1.76 <sup>***</sup><br>(-3.30, -0.22)   | -                                       | -1.01 <sup>***f</sup><br>(-1.87, -0.15) |
| 2-h BG              | -                                                   | -                                      | -                                      | -0.27 <sup>e,f</sup><br>(-3.54, 3.00)   | -8.00 <sup>e,f</sup><br>(-24.40, 8.40)    | -19.96 <sup>**</sup><br>(-20.88, -19.05) | -                                       | -1.70 <sup>f</sup><br>(-4.25, 0.85)     |
| HbA1c               | -0.18 <sup>e</sup><br>(-0.61, 0.25)                 | -                                      | -0.52 <sup>e</sup><br>(-0.19, 0.08)    | -0.05 <sup>e,f</sup><br>(-0.13, 0.03)   | -0.17 <sup>***</sup><br>(-0.32, -0.01)    | -0.26 <sup>***</sup><br>(-0.47, -0.04)   | -                                       | -0.17 <sup>e</sup><br>(-0.37, 0.02)     |

<sup>a</sup> RCT=Randomized control trial

<sup>b</sup> QED=Quasi-experimental design

<sup>c</sup> The 95% confidence intervals are in the parenthesis.

<sup>d</sup> FBG=Fasting plasma glucose

<sup>e</sup> The number of studies is less than 4.

<sup>f</sup> Indicates that fixed-effect model was used to calculate the summary mean difference in outcomes.

<sup>g</sup> 2-h BG=2-hour blood glucose

<sup>h</sup> HbA1c=Hemoglobin A1c

\* Statistical significance at 10% level

\*\* Statistical significance at 5% level.

\*\*\* Statistical significance at 1% level.

- Insufficient data for analysis

**Supplementary Table 7. The effectiveness of lifestyle intervention including nutrition education for diabetes prevention: Study quality rating results**

| Reference                           | Relevance Questions <sup>a</sup> | Validity Questions <sup>b</sup> |     |                  |     |                  |     |     |     |     |     | Quality |
|-------------------------------------|----------------------------------|---------------------------------|-----|------------------|-----|------------------|-----|-----|-----|-----|-----|---------|
|                                     |                                  | 1                               | 2   | 3                | 4   | 5                | 6   | 7   | 8   | 9   | 10  |         |
| Tate, Jackvony et al. 2003,         | Yes                              | Yes                             | Yes | Yes              | Yes | Unc <sup>c</sup> | Yes | Yes | Yes | Yes | Yes | +       |
| Davis-Smith, Boltri et al. 2007,    | Yes                              | Yes                             | unc | No               | Yes | No               | Yes | unc | unc | Yes | Yes | 0       |
| Ackermann, Finch et al. 2008,       | Yes                              | Yes                             | Yes | Yes              | unc | Yes              | Yes | Yes | Yes | Yes | Yes | +       |
| Boltri, Davis-Smith et al. 2008,    | Yes                              | Yes                             | unc | No               | No  | Yes              | Yes | Yes | Yes | Yes | Yes | 0       |
| Estabrooks and Smith-Ray 2008,      | Yes                              | Yes                             | Yes | Yes              | Yes | unc              | Yes | Yes | Yes | Yes | Yes | +       |
| Amundson, Butcher et al. 2009       | Yes                              | Yes                             | Yes | N/A <sup>d</sup> | unc | unc              | Yes | Yes | Yes | Yes | unc | 0       |
| Almeida, Shetterly et al. 2010,     | Yes                              | Yes                             | Yes | Yes              | Yes | Yes              | unc | unc | Yes | Yes | Yes | +       |
| Faridi, Shuval et al. 2010,         | Yes                              | Yes                             | Yes | Yes              | Yes | unc              | unc | Yes | Yes | Yes | Yes | +       |
| Kramer, Kriska et al. 2010,         | Yes                              | Yes                             | Yes | No               | Yes | unc              | Yes | Yes | unc | Yes | Yes | +       |
| Parikh, Simon et al. 2010,          | Yes                              | Yes                             | Yes | Yes              | Yes | Yes              | Yes | Yes | Yes | Yes | Yes | +       |
| Vadheim, McPherson et al. 2010,     | Yes                              | Yes                             | Yes | Yes              | Yes | Yes              | Yes | unc | unc | Yes | Yes | +       |
| Katula, Vitolins et al. 2011,       | Yes                              | Yes                             | Yes | Yes              | Yes | Yes              | Yes | Yes | Yes | Yes | Yes | +       |
| Kramer, McWilliams et al. 2011,     | Yes                              | Yes                             | Yes | No               | Yes | Yes              | Yes | Yes | Yes | Yes | Yes | +       |
| Rosal, Lemon et al. 2011,           | Yes                              | Yes                             | Yes | unc              | Yes | Yes              | Yes | Yes | Yes | Yes | Yes | +       |
| Ruggiero, Oros et al. 2011,         | Yes                              | Yes                             | Yes | unc              | unc | Yes              | Yes | Yes | unc | Yes | Yes | +       |
| Kanaya, Santoyo-Olsson et al. 2012, | Yes                              | Yes                             | Yes | Yes              | Yes | Yes              | Yes | Yes | Yes | Yes | Yes | +       |
| Benyshek, Chino et al. 2013,        | Yes                              | unc                             | Yes | No               | No  | Yes              | Yes | Yes | Yes | Yes | Yes | 0       |
| Cole, Boyer et al. 2013,            | Yes                              | Yes                             | unc | Yes              | Yes | unc              | Yes | Yes | Yes | Yes | Yes | +       |
| Islam, Zanowiak et al. 2013,        | Yes                              | Yes                             | Yes | Yes              | Yes | Yes              | Yes | Yes | unc | Yes | Yes | +       |
| Katula, Vitolins et al. 2013,       | Yes                              | Yes                             | Yes | Yes              | Yes | Yes              | Yes | Yes | Yes | Yes | Yes | +       |

| Reference                             | Relevance | Validity Questions <sup>b</sup> |     |     |     |     |     |     |     |     |     | Quality |   |
|---------------------------------------|-----------|---------------------------------|-----|-----|-----|-----|-----|-----|-----|-----|-----|---------|---|
| Ma, Yank et al. 2013,                 | Yes       | Yes                             | Yes | Yes | Yes | Yes | Yes | Yes | Yes | Yes | Yes | Yes     | + |
| Xiao, Yank et al. 2013,               | Yes       | Yes                             | Yes | unc | Yes | Yes | Yes | unc | Yes | Yes | Yes | Yes     | + |
| Ackermann, Sandy et al. 2014,         | Yes       | Yes                             | Yes | Yes | Yes | Yes | Yes | Yes | Yes | Yes | Yes | Yes     | + |
| Cha, Kim et al. 2014,                 | Yes       | Yes                             | Yes | No  | Yes | No  | Yes | Yes | Yes | Yes | Yes | Yes     | 0 |
| Islam, Zanowiak et al. 2014,          | Yes       | Yes                             | Yes | unc | unc | unc | Yes | Yes | unc | Yes | Yes | Yes     | 0 |
| Kaholokula, Wilson et al. 2014,       | Yes       | Yes                             | Yes | No  | No  | Yes     | + |
| Sepah, Jiang et al. 2014,             | Yes       | Yes                             | No  | No  | unc | unc | Yes | unc | Yes | Yes | unc | unc     | 0 |
| Tang, Nwankwo et al. 2014             | Yes       | Yes                             | Yes | N/A | Yes     | + |
| Brokaw, Carpenedo et al. 2015         | Yes       | Yes                             | Yes | N/A | Yes | Yes | Yes | unc | Yes | Yes | Yes | Yes     | + |
| Fukuoka, Gay et al. 2015              | Yes       | Yes                             | Yes | Yes | Yes | Yes | Yes | unc | Yes | Yes | Yes | Yes     | + |
| Yeh, Heo et al. 2015                  | Yes       | Yes                             | Yes | Yes | Yes | Yes | Yes | unc | Yes | Yes | Yes | Yes     | + |
| Eriksson and Lindgärde 1991           | Yes       | Yes                             | No  | Yes | Yes | unc | Yes | unc | unc | unc | unc | unc     | 0 |
| Eriksson, Lindström et al. 1999       | Yes       | Yes                             | Yes | Yes | Yes | unc | Yes | unc | Yes | unc | unc | unc     | + |
| Wein, Beischer et al. 1999            | Yes       | Yes                             | Yes | Yes | unc | unc | Yes | Yes | unc | Yes | unc | unc     | 0 |
| Tuomilehto, Lindström et al. 2001     | Yes       | Yes                             | Yes | Yes | unc | unc | Yes | Yes | Yes | Yes | unc | unc     | + |
| Lindstrom, Louheranta et al. 2003     | Yes       | Yes                             | Yes | Yes | Yes | unc | Yes | Yes | unc | Yes | unc | unc     | + |
| Watanabe, Yamaoka et al. 2003         | Yes       | Yes                             | Yes | Yes | Yes | unc | Yes | Yes | Yes | Yes | unc | unc     | + |
| Kosaka, Noda et al. 2005              | Yes       | Yes                             | Yes | Yes | Yes | unc | Yes | Yes | Yes | Yes | unc | unc     | + |
| Lindström, Ilanne-Parikka et al. 2006 | Yes       | Yes                             | Yes | Yes | unc | unc | Yes | Yes | Yes | Yes | Yes | Yes     | + |
| Oldroyd, Unwin et al. 2006            | Yes       | Yes                             | Yes | Yes | unc | unc | Yes | Yes | Yes | Yes | unc | unc     | + |
| Absetz, Valve et al. 2007             | Yes       | Yes                             | Yes | Yes | unc | Yes | Yes | Yes | Yes | Yes | unc | unc     | + |
| Kilkinen, Heistaro et al. 2007        | Yes       | Yes                             | Yes | Yes | Yes | unc | Yes | Yes | unc | Yes | unc | unc     | + |
| Laatikainen, Dunbar et al. 2007       | Yes       | Yes                             | Yes | Yes | Yes | unc | Yes | Yes | unc | unc | Yes | unc     | + |
| Barclay, Procter et al. 2008          | Yes       | Yes                             | Yes | Yes | unc | unc | Yes | Yes | unc | Yes | Yes | unc     | + |
| Botomino, Bruppacher et al. 2008      | Yes       | Yes                             | Yes | Yes | unc | unc | Yes | Yes | Yes | Yes | unc | unc     | + |
| Absetz, Oldenburg et al. 2009         | Yes       | Yes                             | Yes | Yes | Yes | unc | Yes | Yes | Yes | unc | Yes | unc     | + |



| Reference                                     | Relevance | Validity Questions <sup>b</sup> |     |     |     |     |     |     |     |     |     |   | Quality |
|-----------------------------------------------|-----------|---------------------------------|-----|-----|-----|-----|-----|-----|-----|-----|-----|---|---------|
| Penn, White et al. 2009                       | Yes       | Yes                             | Yes | Yes | Yes | unc | Yes | Yes | Yes | unc | unc | + |         |
| Kang, Cho et al. 2010                         | Yes       | Yes                             | Yes | Yes | Yes | unc | Yes | Yes | Yes | Yes | Yes | + |         |
| Makrilakis, Liatis et al. 2010                | Yes       | Yes                             | Yes | unc | Yes | unc | Yes | Yes | Yes | Yes | Yes | + |         |
| Pimentel, Portero-McLellan et al. 2010        | Yes       | Yes                             | Yes | Yes | Yes | unc | Yes | Yes | Yes | Yes | Yes | + |         |
| Gilis-Januszewska, Szybinski et al. 2011      | Yes       | Yes                             | Yes | unc | Yes | unc | Yes | Yes | unc | unc | unc | 0 |         |
| Moore, Hardie et al. 2011                     | Yes       | Yes                             | Yes | unc | Yes | unc | Yes | Yes | Yes | Yes | unc | + |         |
| Nilsen, Bakke et al. 2011                     | Yes       | Yes                             | Yes | Yes | Yes | unc | Yes | Yes | Yes | Yes | Yes | + |         |
| Roumen, Feskens et al. 2011                   | Yes       | Yes                             | Yes | Yes | Yes | unc | Yes | unc | Yes | Yes | Yes | + |         |
| Sakane, Sato et al. 2011                      | Yes       | Yes                             | Yes | Yes | Yes | unc | Yes | Yes | Yes | Yes | Yes | + |         |
| Salas-Salvadó, Bulló et al. 2011              | Yes       | Yes                             | Yes | Yes | unc | No  | Yes | Yes | Yes | Yes | Yes | + |         |
| Kontogianni, Liatis et al. 2012               | Yes       | Yes                             | Yes | unc | unc | unc | Yes | Yes | Yes | Yes | Yes | + |         |
| Vermunt, Milder et al. 2012                   | Yes       | Yes                             | Yes | Yes | Yes | unc | Yes | Yes | Yes | unc | unc | + |         |
| Admiraal, Vlaar et al. 2013                   | Yes       | Yes                             | Yes | Yes | Yes | unc | Yes | Yes | Yes | Yes | Yes | + |         |
| Sangeetha, Fatimah et al. 2013                | Yes       | Yes                             | Yes | Yes | Yes | unc | Yes | unc | Yes | Yes | Yes | + |         |
| Telle-Hjellset, Raberg Kjollesdal et al. 2013 | Yes       | Yes                             | Yes | Yes | Yes | unc | Yes | Yes | unc | Yes | Yes | + |         |
| Xu, Sun et al. 2013                           | Yes       | Yes                             | Yes | Yes | Yes | unc | Yes | unc | Yes | Yes | Yes | + |         |
| Bhopal, Douglas et al. 2014                   | Yes       | Yes                             | Yes | Yes | Yes | unc | Yes | unc | Yes | Yes | Yes | + |         |
| Duijzer, Haveman-Nies et al. 2014             | Yes       | Yes                             | Yes | unc | Yes | unc | Yes | Yes | Yes | Yes | Yes | + |         |
| Dunbar, Jayawardena et al. 2014               | Yes       | Yes                             | Yes | unc | Yes | unc | Yes | unc | Yes | unc | Yes | 0 |         |
| Parker, Byham-Gray et al. 2014                | Yes       | Yes                             | Yes | Yes | Yes | unc | Yes | unc | unc | unc | Yes | 0 |         |
| Weir, Johnson et al. 2014                     | Yes       | Yes                             | Yes | unc | Yes | unc | Yes | unc | Yes | Yes | Yes | + |         |
| Dawes, Ashe et al. 2015                       | Yes       | Yes                             | Yes | unc | Yes | unc | Yes | Yes | Yes | Yes | Yes | + |         |
| Schmiedel, Mayr et al. 2015                   | Yes       | Yes                             | Yes | Yes | Yes | unc | Yes | unc | Yes | Yes | Yes | + |         |

<sup>a</sup> Four relevance questions (e.g., “Is the intervention or procedure feasible?”) are included in the Quality Criteria Checklist. Available at: <https://www.uwgb.edu/laceyk/NutSci486/EA%20Quality%20Criteria%20Checklists.doc>

<sup>b</sup> Ten validity questions (e.g., “Was the research question clearly stated?”, “Were study groups comparable?”) are included in the Quality Criteria Checklist. Available at: <https://www.uwgb.edu/laceyk/NutSci486/EA%20Quality%20Criteria%20Checklists.doc>

<sup>c</sup>Unc=unclear;

<sup>d</sup>N/A=not available.

Note: Kappa-statistic (a measure of inter-rater reliability score) is 0.67, indicating substantial amount of agreement between the two raters. Results from one rater are reported in the table.

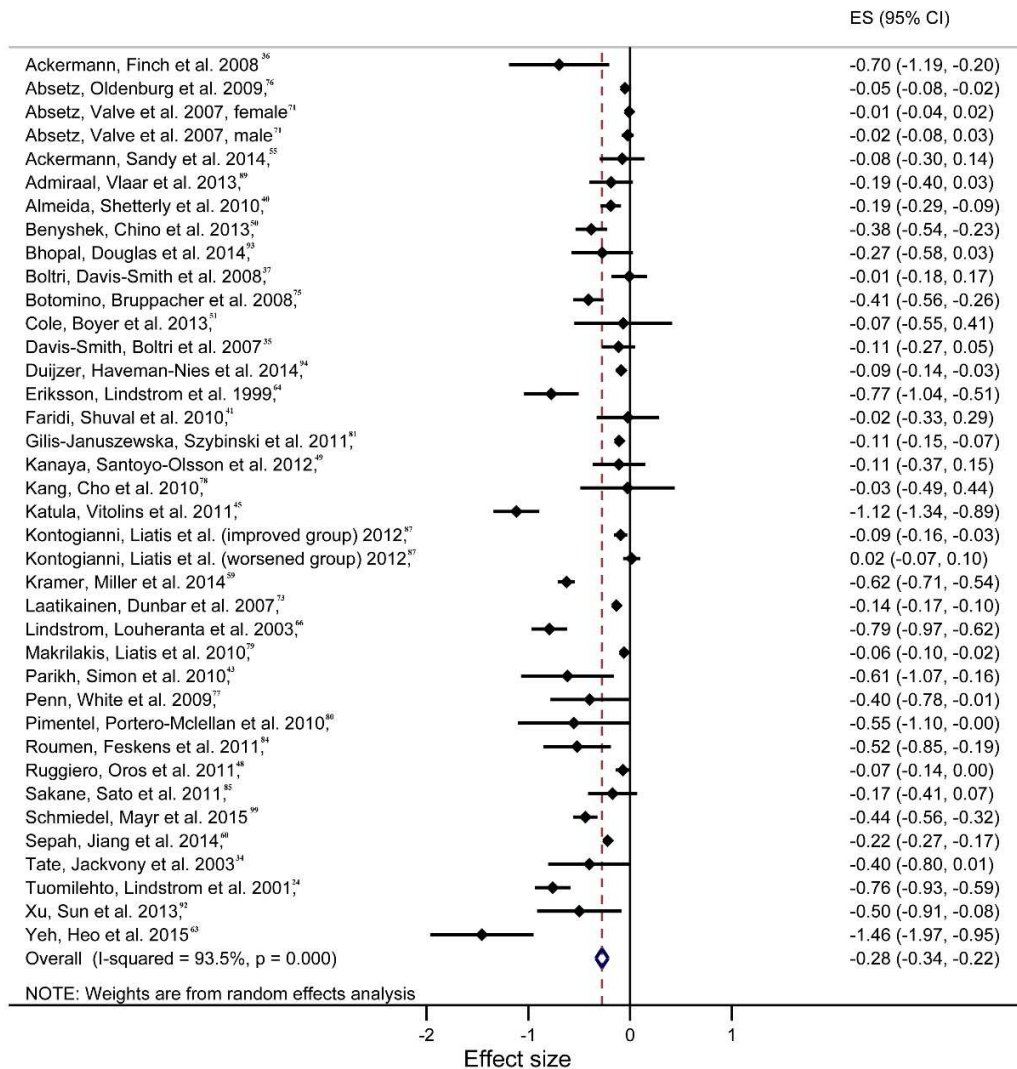

**Supplementary Figure 1.** Forest plot for the overall summary effect size for weight change at 12 months. Each study is identified by author and year. Horizontal lines represent the effect size for each study. The whiskers extending to each side represent the study effect's 95% CI. The diamond indicates the overall mean difference.

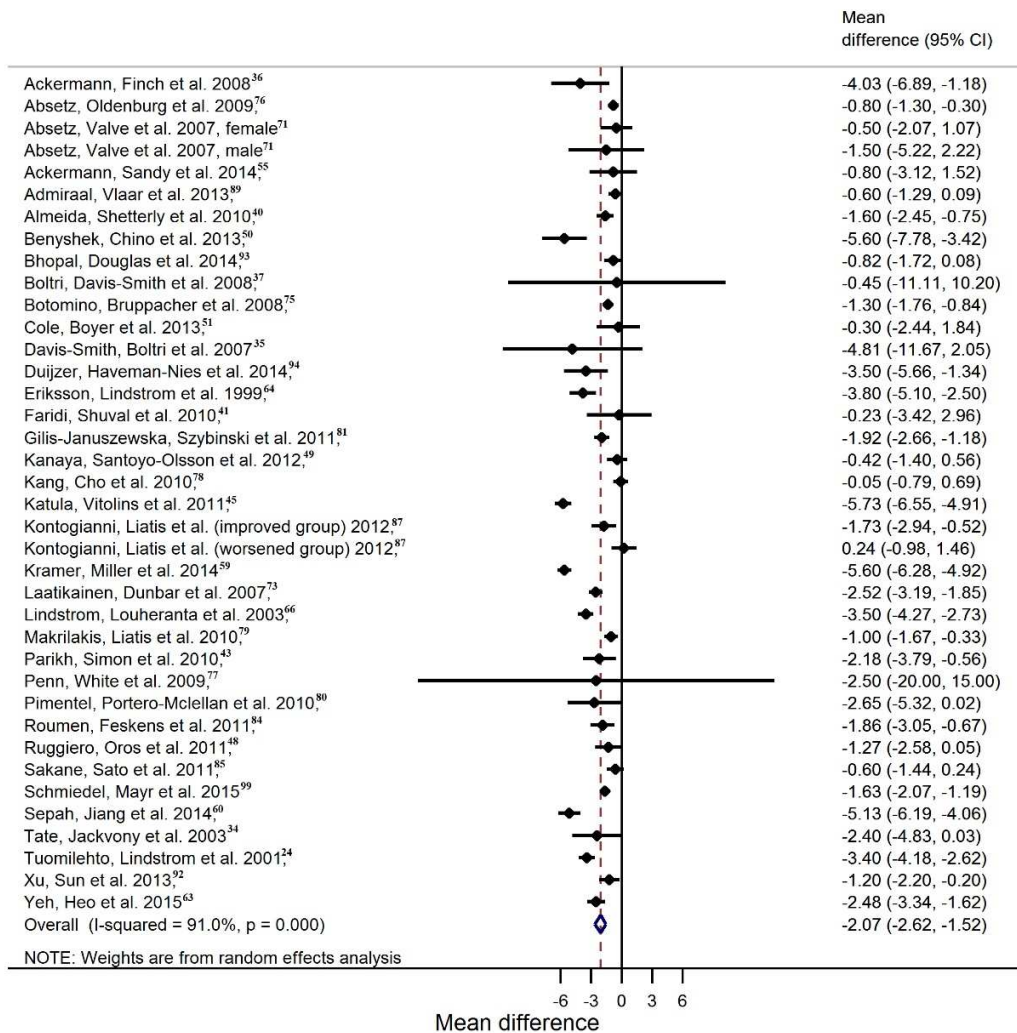

**Supplementary Figure 2.** Forest plot for the overall summary mean difference relative to control group for weight change (in kg) at 12 months. Each study is identified by author and year. Horizontal lines represent the mean difference for each study. The whiskers extending to each side represent the study mean difference's 95% CI. The diamond indicates the overall mean difference.

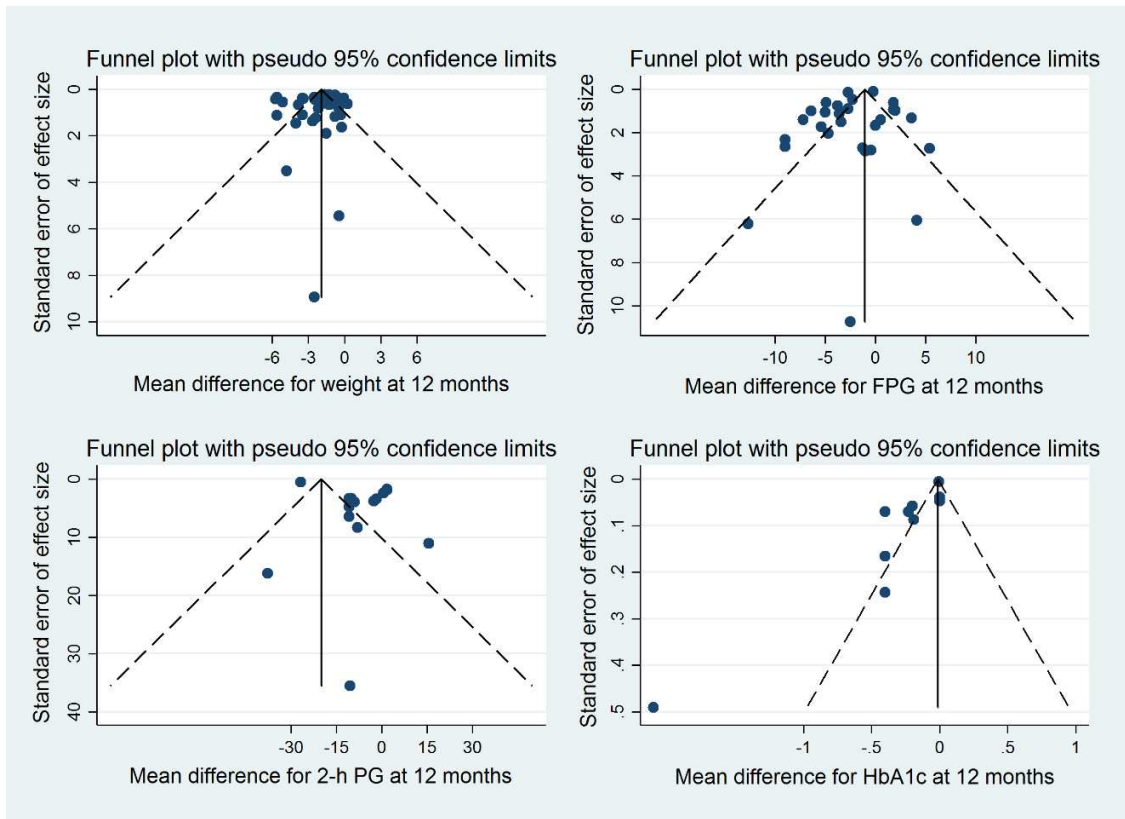

**Supplementary Figure 3. Funnel plots for risk of publication bias: mean difference for weight, fasting and 2-hour blood glucose (BG), and HbA1c at 12 months against the SE. Scatter dots represent individual studies, dashed diagonal lines indicates pseudo 95% confidence interval.**

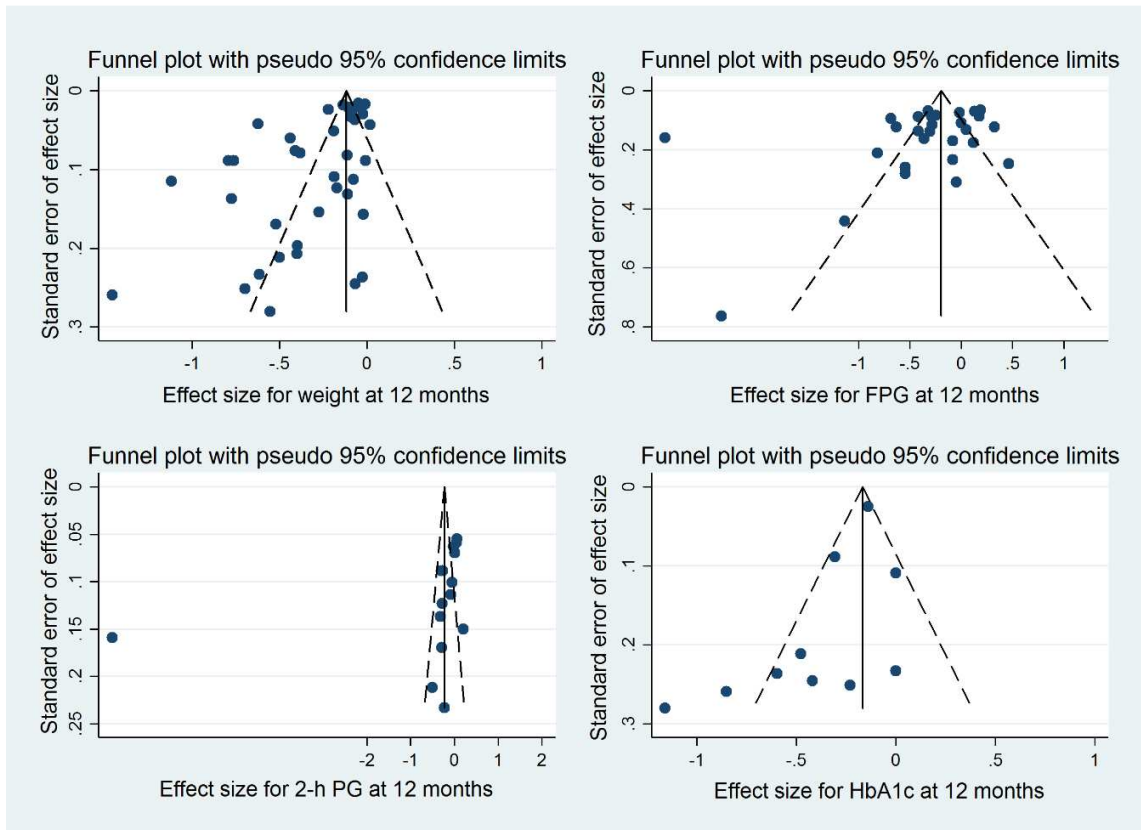

**Supplementary Figure 4. Funnel plots for risk of publication bias: effect size in weight, PBG, 2-h BG and HbA1c at 12 months against the SE. Scatter dots represent individual studies, dashed diagonal lines indicates pseudo 95% confidence interval.**
